# Supplementary material for: Regioselective synthesis of tetrahydroquinolines via syn- and anti-nucleopalladation-initiated cascade processes
Source: Royal Society of Chemistry journal article supplement (doi:10.1039/d0ob01840f), 2020-01-01

## Regioselective Synthesis of Tetrahydroquinolines *via Syn-* and *Anti*-Nucleopalladation- Initiated Cascade Processes

*Muthu Karuppasamy, Perumal Vinoth, N. Pradeep, Subbiah Nagarajan, C. Uma Maheswari,  
and Vellaisamy Sridharan\**

### Supporting Information

#### Table of Contents

|   |                                                                                                                                                                 |     |
|---|-----------------------------------------------------------------------------------------------------------------------------------------------------------------|-----|
| 1 | General Information                                                                                                                                             | S2  |
| 2 | General Procedure for the Synthesis of Compounds <b>7a-p</b>                                                                                                    | S2  |
| 3 | Synthesis of ( <i>E</i> )-4-Methyl- <i>N</i> -(3-(3-nitrophenyl)prop-2-yn-1-yl)- <i>N</i> -(2-(3-oxo-3-phenylprop-1-en-1-yl)phenyl)benzenesulfonamide <b>7q</b> | S7  |
| 4 | Synthesis of ( <i>E</i> )-4-Methyl- <i>N</i> -(2-(3-oxobut-1-en-1-yl)phenyl)- <i>N</i> -(3-phenylprop-2-yn-1-yl)benzenesulfonamide <b>7r</b>                    | S8  |
| 5 | Copies of <sup>1</sup> H and <sup>13</sup> C NMR Spectra                                                                                                        | S10 |

## 1. General Information

All reagents and solvents were purchased from commercial suppliers (Avra, Alfa Aesar, Sigma-Aldrich, CDH, Merck) and used without further purification. All reactions were carried out in oven-dried glassware under a nitrogen atmosphere. The reactions were monitored by thin layer chromatography using Merck silica gel 60 F<sub>254</sub> and visualized by UV detection or using *p*-anisaldehyde stain or molecular iodine. Silica gel (230-400 mesh) was used for flash column chromatography. Melting points were recorded on a melting point apparatus in capillaries and are uncorrected. <sup>1</sup>H and <sup>13</sup>C-NMR spectra were recorded in CDCl<sub>3</sub> at room temperature on a Bruker Avance 300 spectrometer operating at 300 MHz for <sup>1</sup>H and 75 MHz for <sup>13</sup>C. In some cases Bruker 400 MHz NMR instruments was used. Chemical shifts ( $\delta$ ) are expressed in ppm using TMS as an internal standard and coupling constants (*J*) are given in Hz. Infrared (IR) spectra were obtained using an Agilent Cary 630 FTIR Spectrometer with a diamond ATR accessory for solid and liquid samples, requiring no sample preparation and the major frequencies were reported in cm<sup>-1</sup>. Elemental analyses were determined at the CAI de Microanálisis Elemental, Universidad Complutense, by using a Leco 932 CHNS combustion microanalyzer. ESI-MS spectra were obtained with a JMS-T100LC (JEOL) instrument.

## 2. General Procedure for the Synthesis of Compounds 7a-p<sup>1</sup>

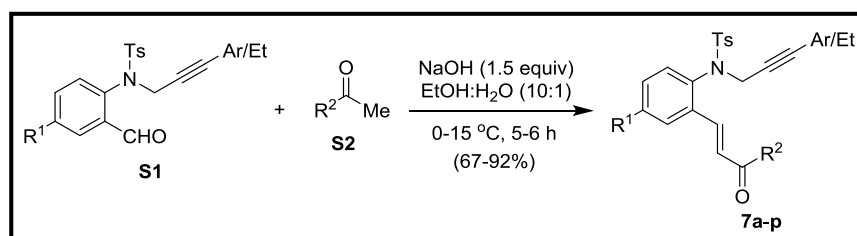

To a solution of methyl ketone **S2** (2.75 mmol, 1.1 equiv) in 10:1 EtOH/H<sub>2</sub>O (15 mL) mixture was stirred with NaOH (3.75 mmol, 1.5 equiv) at 0 °C. After 10 minutes, aldehyde **S1** (2.5 mmol, 1.0 equiv) was added and stirring was continued at 10-15 °C for 5-6 h. After completion of the reaction, the reaction mixture was poured into ice water and acidified with 1.5 N HCl. The aqueous suspension was extracted with DCM (2 x 60 mL), washed with water and brine. The organic layer was dried over anhydrous Na<sub>2</sub>SO<sub>4</sub> and concentrated under reduced pressure. The crude product was purified by flash column chromatography using petroleum ether and ethyl acetate mixture as eluent (90:10, v/v) to obtain the desired products **7a-p**.

<sup>1</sup> P. Vinoth, M. Karuppasamy, B. S. Vachan, I. Muthukrishnan, C. U. Maheswari, S. Nagarajan, V. Pace, A. Roller, N. Bhuvanesh and V. Sridharan, *Org. Lett.*, 2019, **21**, 3465–3469.

**(E)-4-Methyl-N-(2-(3-oxo-3-phenylprop-1-en-1-yl)phenyl)-N-(3-phenylprop-2-yn-1-yl)benzenesulfonamide (7a):**<sup>1</sup>

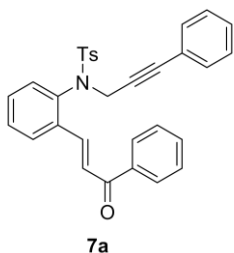

Yellow solid; mp: 114-115 °C; yield: 1.104 g, 90%; <sup>1</sup>H NMR (300 MHz, CDCl<sub>3</sub>): δ 2.33 (s, 3H), 4.45 (brs, 1H), 4.88 (brs, 1H), 7.13-7.17 (m, 3H), 7.18-7.27 (m, 4H), 7.33-7.53 (m, 6H), 7.58 (tt, *J* = 7.2, 1.2 Hz, 1H), 7.66 (d, *J* = 8.4 Hz, 2H), 7.82 (dd, *J* = 7.8, 1.8 Hz, 1H), 7.98-8.04 (m, 3H); <sup>13</sup>C NMR (75 MHz, CDCl<sub>3</sub>): δ\* 21.5, 42.6, 82.9, 86.1, 122.2, 125.0, 127.6, 128.2, 128.5, 128.6, 128.8, 129.4, 129.6, 130.2, 130.6, 131.5, 132.8, 135.9, 136.2, 137.9, 138.8, 140.5, 144.0, 191.2. \*One aromatic carbon is merged with others.

**(E)-4-Methyl-N-(2-(3-oxo-3-(*p*-tolyl)prop-1-en-1-yl)phenyl)-N-(3-phenylprop-2-yn-1-yl)benzenesulfonamide (7b):**<sup>1</sup>

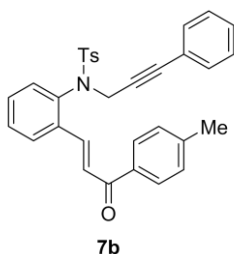

Off-white solid; mp: 101-102 °C; yield: 1.072 g, 85%; <sup>1</sup>H NMR (300 MHz, CDCl<sub>3</sub>): δ 2.26 (s, 3H), 2.37 (s, 3H), 4.42 (brs, 1H), 4.71 (brs, 1H), 7.07-7.38 (m, 13H), 7.59 (d, *J* = 8.4 Hz, 2H), 7.74 (dd, *J* = 7.5, 1.2 Hz, 1H), 7.84 (d, *J* = 8.4 Hz, 2H), 7.92 (d, *J* = 15.9 Hz, 1H); <sup>13</sup>C NMR (75 MHz, CDCl<sub>3</sub>): δ\* 21.5, 21.7, 42.6, 82.9, 86.0, 122.2, 125.1, 127.6, 128.2, 128.3, 128.5, 129.0, 129.3, 129.6, 130.3, 130.5, 131.5, 135.4, 135.9, 136.3, 138.7, 140.0, 143.6, 144.0, 190.7. \*One aromatic carbon is merged with others.

**(E)-N-(2-(3-(4-Methoxyphenyl)-3-oxoprop-1-en-1-yl)phenyl)-4-methyl-N-(3-phenylprop-2-yn-1-yl)benzenesulfonamide (7c):**<sup>1</sup>

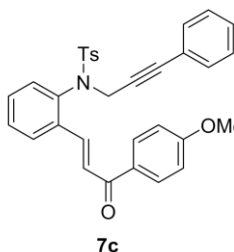

Yellow viscous liquid; yield: 1.198 g, 92%; <sup>1</sup>H NMR (300 MHz, CDCl<sub>3</sub>): δ 2.33 (s, 3H), 3.90 (s, 3H), 4.50 (brs, 1H), 4.79 (brs, 1H), 6.98 (d, *J* = 9.0 Hz, 2H), 7.14-7.27 (m, 7H), 7.31-7.45 (m, 4H), 7.67 (d, *J* = 8.1 Hz, 2H), 7.80 (dd, *J* = 7.8, 1.5 Hz, 1H), 7.97 (d, *J* = 15.9 Hz, 1H), 8.02 (d, *J* = 7.2 Hz, 2H); <sup>13</sup>C NMR (75 MHz, CDCl<sub>3</sub>): δ 21.5, 42.6, 55.5, 82.9, 86.0, 113.9, 122.2, 125.0, 127.7, 128.2, 128.3, 128.5, 129.3, 129.6, 130.2, 130.4, 130.8, 131.2, 131.5, 136.0, 136.4, 138.6, 139.5, 144.0, 163.4, 189.4.

**(E)-N-(2-(3-(2-Chlorophenyl)-3-oxoprop-1-en-1-yl)phenyl)-4-methyl-N-(3-phenylprop-2-yn-1-yl)benzenesulfonamide (7d):**<sup>1</sup>

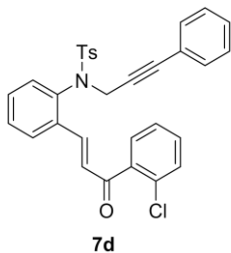

Yellow solid; mp: 124-125 °C; yield: 1.010 g, 77%; <sup>1</sup>H NMR (300 MHz, CDCl<sub>3</sub>): δ 2.32 (s, 3H), 4.36 (brs, 1H), 4.59 (brs, 1H), 6.98 (d, *J* = 16.2 Hz, 1H), 7.03-7.08 (m, 2H), 7.14-7.25 (m, 6H), 7.22-7.44 (m, 6H), 7.52 (d, *J* = 8.4 Hz, 2H), 7.74 (d, *J* = 16.2 Hz, 1H), 7.75 (dd, *J* = 8.1, 1.5 Hz, 1H); <sup>13</sup>C NMR (75 MHz, CDCl<sub>3</sub>): δ\* 21.6, 42.6, 82.7, 86.0, 122.1, 126.8, 127.5, 128.1, 128.3, 128.6, 129.4, 129.6, 129.7, 129.8, 130.3, 131.0, 131.3, 131.5, 135.7, 135.8, 138.5, 138.9, 142.5, 144.0, 194.0. \*Two aromatic carbons are merged with others.

**(E)-N-(2-(3-(4-Chlorophenyl)-3-oxoprop-1-en-1-yl)phenyl)-4-methyl-N-(3-phenylprop-2-yn-1-yl)benzenesulfonamide (7e):**<sup>1</sup>

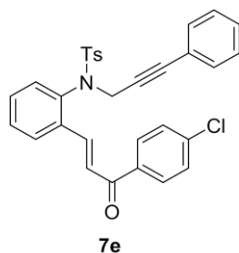

Yellow solid; mp: 122-123 °C; yield: 1.039 g, 79%; <sup>1</sup>H NMR (300 MHz, CDCl<sub>3</sub>): δ 2.29 (s, 3H), 4.46 (brs, 1H), 4.64 (brs, 1H), 7.03-7.08 (m, 3H), 7.12-7.23 (m, 4H), 7.24-7.41 (m, 6H), 7.59 (d, *J* = 8.4 Hz, 2H), 7.75 (dd, *J* = 7.8, 1.5 Hz, 1H), 7.87 (d, *J* = 8.4 Hz, 2H), 7.98 (d, *J* = 15.9 Hz, 1H); <sup>13</sup>C NMR (75 MHz, CDCl<sub>3</sub>): δ\* 21.6, 42.7, 82.8, 86.1, 122.1, 124.7, 127.7, 128.2, 128.6, 128.9, 129.4, 129.6, 129.9, 130.3, 130.8, 131.5, 135.8, 136.1, 136.2, 138.9, 139.1, 141.1, 144.1, 190.2. \*One aromatic carbon is merged with others.

**(E)-4-Methyl-N-(2-(3-(naphthalen-1-yl)-3-oxoprop-1-en-1-yl)phenyl)-N-(3-phenylprop-2-yn-1-yl)benzenesulfonamide (7f):**<sup>1</sup>

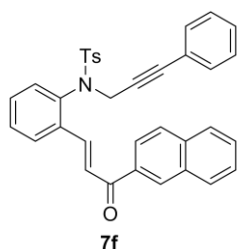

Yellow solid; mp: 109-110 °C; yield: 1.204 g, 89%; <sup>1</sup>H NMR (300 MHz, CDCl<sub>3</sub>): δ 2.24 (s, 3H), 4.45 (brs, 1H), 4.65 (brs, 1H), 7.04-7.20 (m, 9H), 7.29 (td, *J* = 7.5, 1.5 Hz, 1H), 7.37 (td, *J* = 7.5, 1.5 Hz, 1H), 7.43 (d, *J* = 16.2 Hz, 1H), 7.47-7.55 (m, 2H), 7.59 (d, *J* = 8.4 Hz, 2H), 7.79-7.88 (m, 3H), 7.96-8.01 (m, 2H), 8.01 (d, *J* = 16.2 Hz, 1H); <sup>13</sup>C NMR (75 MHz, CDCl<sub>3</sub>): δ 21.5, 42.7, 82.9, 86.1, 122.2, 124.8, 125.3, 126.8, 127.7, 127.8, 128.2, 128.3, 128.4, 128.5, 128.6, 129.4, 129.6, 129.8, 130.2, 130.6, 130.7, 131.5, 132.6, 135.1, 135.5, 135.9, 136.4, 138.8, 140.5, 144.0, 191.4.

**(E)-4-Methyl-N-(2-(3-oxo-3-phenylprop-1-en-1-yl)phenyl)-N-(3-(p-tolyl)prop-2-yn-1-yl)benzenesulfonamide (7g):**<sup>1</sup>

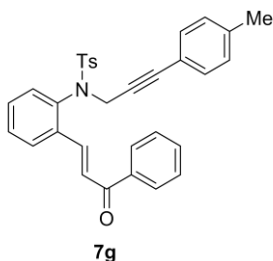

Off-white solid; mp: 99-100 °C; yield: 1.060 g, 84%; <sup>1</sup>H NMR (300 MHz, CDCl<sub>3</sub>): δ 2.30 (s, 3H), 2.34 (s, 3H), 4.50 (brs, 1H), 4.74 (brs, 1H), 7.00-7.06 (m, 4H), 7.15 (dd, *J* = 7.8, 1.2 Hz, 1H), 7.22 (d, *J* = 8.1 Hz, 2H), 7.32-7.52 (m, 5H), 7.58 (tt, *J* = 8.1, 1.5 Hz, 1H), 7.66 (d, *J* = 8.1 Hz, 2H), 7.81 (dd, *J* = 7.8, 1.5 Hz, 1H), 7.98-8.04 (m, 3H); <sup>13</sup>C NMR (75 MHz, CDCl<sub>3</sub>): δ 21.4, 21.5, 42.7, 82.2, 86.2, 119.1, 125.0, 127.6, 128.2, 128.6, 128.9, 129.0, 129.3, 129.6, 130.3, 130.6, 131.4, 132.7, 135.9, 136.3, 137.9, 138.7, 138.8, 140.6, 144.0, 191.3.

**(E)-4-Methyl-N-(2-(3-oxo-3-(thiophen-2-yl)prop-1-en-1-yl)phenyl)-N-(3-(p-tolyl)prop-2-yn-1-yl)benzenesulfonamide (7h):**<sup>1</sup>

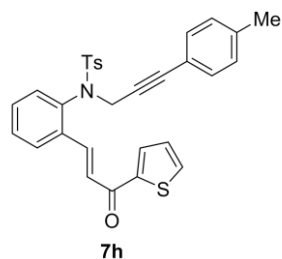

Colourless solid; mp: 204-205 °C; yield: 1.136 g, 89%; <sup>1</sup>H NMR (300 MHz, CDCl<sub>3</sub>): δ 2.30 (s, 3H), 2.34 (s, 3H), 4.50 (brs, 1H), 4.78 (brs, 1H), 7.02 (d, *J* = 8.4 Hz, 2H), 7.06 (d, *J* = 8.4 Hz, 2H), 7.16-7.29 (m, 4H), 7.30-7.45 (m, 3H), 7.67-7.69 (m, 3H), 7.78 (dd, *J* = 7.8, 1.5 Hz, 1H), 7.88 (dd, *J* = 3.9, 1.2 Hz, 1H), 8.04 (d, *J* = 15.9 Hz, 1H); <sup>13</sup>C NMR (75 MHz, CDCl<sub>3</sub>): δ 21.4, 21.5, 42.7, 82.2, 86.2, 119.1, 124.5, 127.9, 128.2, 128.3, 129.0, 129.3, 129.6, 130.4, 130.6, 131.4, 132.4, 133.9, 135.9, 136.0, 138.7, 138.8, 139.5, 144.0, 145.2, 182.4.

**(E)-N-(3-(3,4-Dimethylphenyl)prop-2-yn-1-yl)-4-methyl-N-(2-(3-oxo-3-(p-tolyl)prop-1-en-1-yl)phenyl)benzenesulfonamide (7i):**

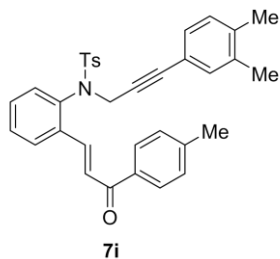

Pale brown viscous liquid; yield: 1.041 g, 78%;  $^1\text{H}$  NMR (300 MHz,  $\text{CDCl}_3$ ):  $\delta$  2.16 (s, 3H), 2.20 (s, 3H), 2.35 (s, 3H), 2.44 (s, 3H), 4.47 (brs, 1H), 4.79 (brs, 1H), 6.88-6.99 (m, 3H), 7.16 (d,  $J = 7.8$  Hz, 1H), 7.22-7.44 (m, 7H), 7.67 (d,  $J = 8.1$  Hz, 2H), 7.81 (d,  $J = 6.6$  Hz, 1H), 7.92 (d,  $J = 7.8$  Hz, 2H), 7.99 (d,  $J = 15.9$  Hz, 1H);  $^{13}\text{C}$  NMR (75 MHz,  $\text{CDCl}_3$ ):  $\delta^*$  19.5, 19.7, 21.5, 21.7, 42.7, 81.9, 86.3, 119.4, 125.0, 127.6, 128.3, 128.9, 129.0, 129.3, 129.5, 129.6, 130.3, 130.5, 132.6, 135.4, 136.0, 136.3, 136.5, 137.5, 138.7, 140.0, 143.5, 143.9, 190.7; Anal Calcd for  $\text{C}_{34}\text{H}_{31}\text{NO}_3\text{S}$ : C, 76.52; H, 5.86; N, 2.62.

Found: C, 76.41; H, 5.74; N, 2.68. \*One aromatic carbon is merged with others.

**(E)-N-(3-(4-Methoxyphenyl)prop-2-yn-1-yl)-4-methyl-N-(2-(3-oxo-3-(p-tolyl)prop-1-en-1-yl)phenyl)benzenesulfonamide (7j):**

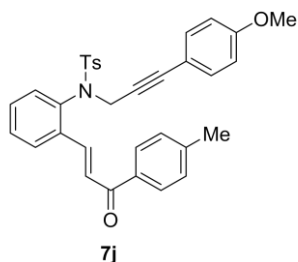

Off-white solid; mp: 116-117  $^\circ\text{C}$ ; yield: 0.895 g, 67%;  $^1\text{H}$  NMR (400 MHz,  $\text{CDCl}_3$ ):  $\delta$  2.33 (s, 3H), 2.43 (s, 3H), 3.76 (s, 3H), 4.49 (brs, 1H), 4.75 (brs, 1H), 6.73 (d,  $J = 8.8$  Hz, 2H), 7.09 (d,  $J = 8.8$  Hz, 2H), 7.15 (dd,  $J = 8.0, 1.6$  Hz, 1H), 7.22 (d,  $J = 8.4$  Hz, 2H), 7.29 (d,  $J = 8.4$  Hz, 2H), 7.30 (td,  $J = 8.4, 1.6$  Hz, 1H), 7.36 (d,  $J = 16.0$  Hz, 1H), 7.41 (td,  $J = 8.4, 1.6$  Hz, 1H), 7.66 (d,  $J = 8.0$  Hz, 2H), 7.80 (dd,  $J = 8.0, 1.6$  Hz, 1H), 7.91 (d,  $J = 8.4$  Hz, 2H), 8.00 (d,  $J = 16.0$  Hz, 1H);  $^{13}\text{C}$  NMR (100 MHz,  $\text{CDCl}_3$ ):  $\delta$  20.7, 20.9, 41.9, 54.4, 80.6, 85.1, 113.0, 113.5, 124.2, 126.7, 127.4, 128.2, 128.4,

128.5, 128.7, 129.5, 129.6, 132.1, 134.5, 135.1, 135.5, 137.9, 139.2, 142.7, 143.1, 158.9, 189.8.

**(E)-N-(2-(3-(Furan-2-yl)-3-oxoprop-1-en-1-yl)phenyl)-N-(3-(4-methoxyphenyl)prop-2-yn-1-yl)-4-methylbenzenesulfonamide (7k):**

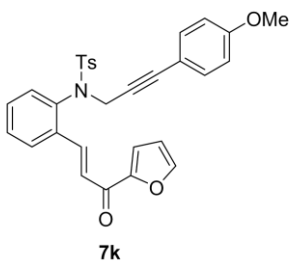

Grey solid; mp: 116-117  $^\circ\text{C}$ ; yield: 1.049 g, 82%;  $^1\text{H}$  NMR (300 MHz,  $\text{CDCl}_3$ ):  $\delta$  2.35 (s, 3H), 3.77 (s, 3H), 4.52 (brs, 1H), 4.75 (brs, 1H), 6.58-6.60 (m, 1H), 6.75 (d,  $J = 9.0$  Hz, 2H), 7.13 (d,  $J = 9.0$  Hz, 2H), 7.19 (dd,  $J = 8.1, 1.2$  Hz, 1H), 7.23-7.28 (m, 3H), 7.34-7.42 (m, 3H), 7.65-7.70 (m, 3H), 7.79 (dd,  $J = 7.5, 1.5$  Hz, 1H), 8.09 (d,  $J = 15.9$  Hz, 1H);  $^{13}\text{C}$  NMR (75 MHz,  $\text{CDCl}_3$ ): 21.5, 42.7, 55.3, 81.5, 86.0, 112.5, 113.8, 114.3, 118.0, 124.0, 127.7, 128.2, 129.3, 129.6, 130.5, 130.6, 133.0, 136.0, 136.1, 138.8, 139.4, 144.0, 146.6, 153.4, 159.7, 178.1; Anal Calcd for  $\text{C}_{30}\text{H}_{25}\text{NO}_5\text{S}$ : C, 70.43; H, 4.93; N, 2.74.

Found: C, 70.18; H, 4.71; N, 2.72.

**(E)-4-Methyl-N-(2-(3-oxo-3-phenylprop-1-en-1-yl)phenyl)-N-(pent-2-yn-1-yl)benzenesulfonamide (7l):**

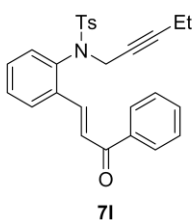

Yellow viscous liquid; yield: 0.920 g, 83%;  $^1\text{H}$  NMR (300 MHz,  $\text{CDCl}_3$ ):  $\delta$  0.92 (t,  $J = 7.5$  Hz, 3H), 1.95-2.02 (m, 2H), 2.34 (s, 3H), 4.31 (brs, 1H), 4.43 (brs, 1H), 7.09 (d,  $J = 7.5$  Hz, 1H), 7.23 (d,  $J = 8.1$  Hz, 2H), 7.30-7.45 (m, 3H), 7.50-7.65 (m, 5H), 7.80 (d,  $J = 6.6$  Hz, 1H), 7.94-8.03 (m, 3H);  $^{13}\text{C}$  NMR (75 MHz,  $\text{CDCl}_3$ ): 12.2, 13.4, 21.5, 42.3, 73.0, 88.1, 124.8, 127.5,

128.2, 128.5, 128.9, 129.2, 129.5, 130.3, 130.5, 132.8, 135.9, 136.2, 137.9, 138.8, 140.8, 143.8, 191.4; Anal Calcd for C<sub>27</sub>H<sub>25</sub>NO<sub>3</sub>S: C, 73.11; H, 5.68; N, 3.16. Found: C, 72.83; H, 5.55; N, 3.08.

**(E)-4-Methyl-N-(2-(3-oxo-3-(p-tolyl)prop-1-en-1-yl)phenyl)-N-(pent-2-yn-1-yl)benzenesulfonamide (7m):**

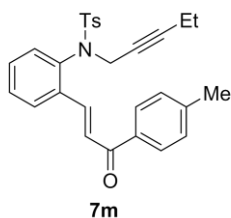

Pale yellow viscous liquid; yield: 1.030 g, 90%; <sup>1</sup>H NMR (300 MHz, CDCl<sub>3</sub>): δ 0.92 (t, *J* = 7.5 Hz, 3H), 1.95-2.03 (m, 2H), 2.34 (s, 3H), 2.45 (s, 3H), 4.31 (brs, 1H), 4.46 (brs, 1H), 7.10 (d, *J* = 7.5, 1H), 7.22 (d, *J* = 8.1 Hz, 2H), 7.30-7.44 (m, 5H), 7.62 (d, *J* = 8.4 Hz, 2H), 7.79 (d, *J* = 7.8 Hz, 1H), 7.91-7.96 (m, 3H); <sup>13</sup>C NMR (75 MHz, CDCl<sub>3</sub>): 12.2, 13.4, 21.5, 21.7, 42.3, 73.0, 88.1, 124.8, 127.5, 128.2, 129.0, 129.2, 129.3, 129.4, 130.3, 130.4, 135.4, 136.0, 136.3, 138.8, 140.2, 143.6, 143.8, 190.7; Anal Calcd for C<sub>28</sub>H<sub>27</sub>NO<sub>3</sub>S: C, 73.50; H, 5.95; N, 3.06. Found: C,

73.23; H, 5.96; N, 2.99.

**(E)-N-(4-Chloro-2-(3-oxo-3-phenylprop-1-en-1-yl)phenyl)-4-methyl-N-(3-phenylprop-2-yn-1-yl)benzenesulfonamide (7n):**<sup>1</sup>

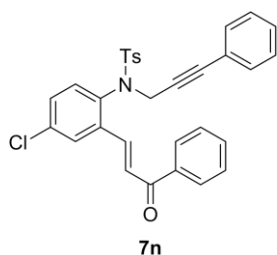

Yellow viscous liquid; yield: 0.971 g, 74%; <sup>1</sup>H NMR (300 MHz, CDCl<sub>3</sub>): δ 2.25 (s, 3H), 4.42 (brs, 1H), 4.68 (brs, 1H), 7.03-7.26 (m, 9H), 7.29 (d, *J* = 15.9 Hz, 1H), 7.41-7.46 (t, *J* = 6.9 Hz, 2H), 7.52 (d, *J* = 7.5 Hz, 1H), 7.58 (d, *J* = 8.1 Hz, 2H), 7.70 (d, *J* = 2.4 Hz, 1H), 7.85 (d, *J* = 15.9 Hz, 1H), 7.92 (d, *J* = 8.4 Hz, 2H); <sup>13</sup>C NMR (75 MHz, CDCl<sub>3</sub>): 21.5, 42.6, 82.5, 86.3, 122.0, 125.7, 127.4, 128.2, 128.3, 128.6, 128.7, 128.8, 129.7, 130.4, 131.5, 131.6, 133.0, 135.3, 135.6, 137.1, 137.6, 138.0, 138.9, 144.2, 190.5.

**(E)-N-(4-Bromo-2-(3-oxo-3-phenylprop-1-en-1-yl)phenyl)-4-methyl-N-(3-(p-tolyl)prop-2-yn-1-yl)benzenesulfonamide (7o):**<sup>1</sup>

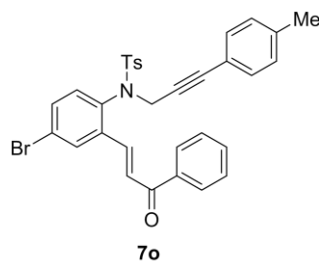

Colourless solid; mp: 97-98 °C; yield: 1.066 g, 73%; <sup>1</sup>H NMR (400 MHz, CDCl<sub>3</sub>): δ 2.30 (s, 3H), 2.32 (s, 3H), 4.46 (brs, 1H), 4.73 (brs, 1H), 7.02-7.07 (m, 5H), 7.23 (d, *J* = 8.0 Hz, 2H), 7.35 (d, *J* = 16.0 Hz, 1H), 7.46 (dd, *J* = 8.4, 2.4 Hz, 1H), 7.48-7.53 (m, 2H), 7.60 (tt, *J* = 7.2, 1.6 Hz, 1H), 7.65 (d, *J* = 8.4 Hz, 2H), 7.89-7.93 (m, 2H), 7.98-8.00 (m, 2H); <sup>13</sup>C NMR (100 MHz, CDCl<sub>3</sub>): δ\* 21.4, 21.5, 42.6, 81.8, 86.5, 118.9, 123.4, 125.7, 128.2, 128.6, 128.8, 129.0, 129.7, 130.4, 131.4, 131.8, 133.0, 133.4, 135.6, 137.6, 138.3, 138.8, 144.1, 190.5. \*Two aromatic carbons are

merged with others.

**(*E*)-*N*-(4-Bromo-2-(3-oxo-3-(*p*-tolyl)prop-1-en-1-yl)phenyl)-4-methyl-*N*-(pent-2-yn-1-yl)benzenesulfonamide (**7p**):**

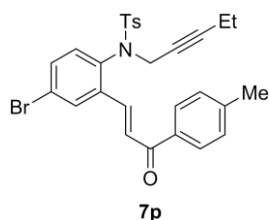

Pale brown viscous liquid; yield: 1.046 g, 78%;  $^1\text{H}$  NMR (300 MHz,  $\text{CDCl}_3$ ):  $\delta$  0.94 (s, 3H), 1.97-2.04 (m, 2H), 2.33 (s, 3H), 2.45 (s, 3H), 4.30 (brs, 1H), 4.41 (brs, 1H), 6.98 (d,  $J = 8.4$ , 1H), 7.23 (d,  $J = 8.4$  Hz, 2H), 7.31-7.36 (m, 3H), 7.45 (dd,  $J = 8.4$ , 2.1 Hz, 1H), 7.61 (d,  $J = 8.4$  Hz, 2H), 7.83 (d,  $J = 15.9$  Hz, 1H), 7.90-7.94 (m, 3H);  $^{13}\text{C}$  NMR (75 MHz,  $\text{CDCl}_3$ ): 12.2, 13.4, 21.5, 21.7, 42.2, 72.8, 88.4, 123.3, 125.6, 128.2, 129.0, 129.4, 129.6, 130.3, 132.0, 133.2, 135.1, 135.7, 137.6, 138.4, 138.5, 143.9, 144.1, 189.9; Anal Calcd for  $\text{C}_{28}\text{H}_{26}\text{BrNO}_3\text{S}$ : C, 62.69; H, 4.89; N, 2.61. Found: C, 62.53; H, 4.82; N, 2.49.

**3. Synthesis of (*E*)-4-Methyl-*N*-(3-(3-nitrophenyl)prop-2-yn-1-yl)-*N*-(2-(3-oxo-3-phenylprop-1-en-1-yl)phenyl)benzenesulfonamide **7q**<sup>1</sup>**

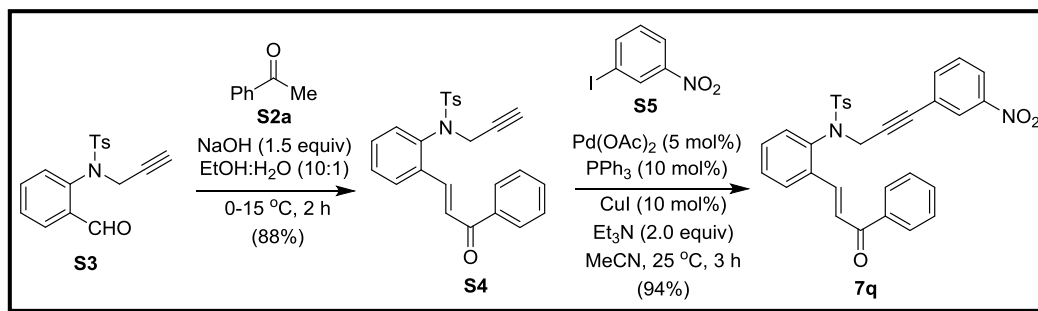

To a solution of acetophenone **S2a** (2.75 mmol, 1.1 equiv) in 10:1 EtOH/ $\text{H}_2\text{O}$  mixture (15 mL) was added NaOH (3.75 mmol, 1.5 equiv) at 0 °C. After 10 minutes of stirring, aldehyde **S3** (2.5 mmol, 1.0 equiv) was added and stirring was continued at 10-15 °C for 2 h. After completion of the reaction, the reaction mixture was poured into ice water and acidified with 1.5 N HCl. The aqueous suspension was extracted with DCM (2 x 60 mL), washed with water and brine. The organic layer was dried over anhydrous  $\text{Na}_2\text{SO}_4$  and concentrated under reduced pressure. The crude product was purified by flash column chromatography using petroleum ether and ethyl acetate mixture as eluent (90:10, v/v) to deliver compound **S4**.

To a stirred solution of compound **S4** (2.5 mmol, 1.0 equiv) in MeCN (50 mL) were added 3-nitroiodobenzene **S5** (3 mmol, 1.2 equiv),  $\text{Pd}(\text{OAc})_2$  (0.125 mmol, 5 mol%),  $\text{PPh}_3$  (0.25 mmol, 10 mol%), CuI (0.25 mmol, 10 mol%), and  $\text{Et}_3\text{N}$  (5.0 mmol, 2.0 equiv) successively. The resulting mixture was degassed with nitrogen and stirred at room temperature for 3 h. After completion of the reaction, as indicated by TLC, the reaction mixture was filtered through a pad of celite and the celite bed was washed well with ethyl acetate (100 mL). The filtrate was washed with water, brine and dried over anhydrous  $\text{Na}_2\text{SO}_4$ . The solvent was evaporated to dryness under reduced pressure and the crude mixture was chromatographed over silica using petroleum ether and ethyl acetate mixture (93:7, v/v) as eluent to obtain the desired product **7q**.

**(E)-4-methyl-N-(2-(3-oxo-3-phenylprop-1-en-1-yl)phenyl)-N-(prop-2-yn-1-yl)benzenesulfonamide (S4):<sup>1</sup>**

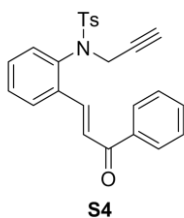

Off-white solid; mp: 137-138 °C; yield: 1.006 g, 88%; <sup>1</sup>H NMR (300 MHz, CDCl<sub>3</sub>): δ 2.17 (t, *J* = 2.4 Hz, 1H), 2.33 (s, 3H), 4.35 (brs, 1H), 4.44 (brs, 1H), 7.14 (dd, *J* = 7.8, 1.2 Hz, 1H), 7.23 (d, *J* = 6.9 Hz, 2H), 7.33-7.46 (m, 3H), 7.50-7.54 (m, 2H), 7.58-7.62 (m, 3H), 7.80 (dd, *J* = 7.5, 1.2 Hz, 1H), 7.90 (d, *J* = 15.9 Hz, 1H), 8.00 (d, *J* = 7.2 Hz, 2H); <sup>13</sup>C NMR (75 MHz, CDCl<sub>3</sub>): δ\* 21.5, 41.7, 74.3, 124.9, 127.6, 128.2, 128.6, 128.8, 129.4, 129.6, 130.4, 130.7, 132.8, 135.6, 136.0, 137.9, 138.5, 140.3, 144.1, 191.0. \*One aromatic carbon is merged with others.

**(E)-4-Methyl-N-(3-(3-nitrophenyl)prop-2-yn-1-yl)-N-(2-(3-oxo-3-phenylprop-1-en-1-yl)phenyl)benzenesulfonamide (7q):**

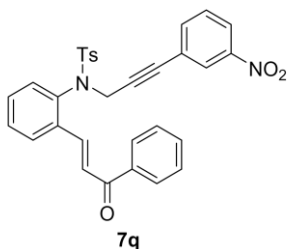

Pale brown solid; mp: 82-83 °C; yield: 1.261 g, 94%; <sup>1</sup>H NMR (300 MHz, CDCl<sub>3</sub>): δ 2.34 (s, 3H), 4.62 (brs, 1H), 4.71 (brs, 1H), 7.17 (dd, *J* = 7.8, 1.2 Hz, 1H), 7.25-7.28 (m, 2H), 7.37-7.44 (m, 3H), 7.46-7.53 (m, 5H), 7.67 (d, *J* = 8.4 Hz, 2H), 7.84 (dd, *J* = 7.5, 1.2 Hz, 1H), 7.98-8.01 (m, 4H), 8.09-8.12 (m, 1H); <sup>13</sup>C NMR (75 MHz, CDCl<sub>3</sub>): δ 21.5, 42.5, 83.6, 85.8, 123.3, 123.9, 124.7, 126.3, 127.6, 128.2, 128.6, 128.7, 129.3, 129.6, 129.7, 130.2, 130.8, 132.9, 135.8, 136.2, 137.3, 137.8, 138.7, 140.2, 144.3, 147.9, 190.6; Anal Calcd for C<sub>31</sub>H<sub>24</sub>N<sub>2</sub>O<sub>5</sub>S: C, 69.39; H, 4.51; N, 5.22. Found: C, 69.02; H, 4.62;

N, 5.14.

**4. Synthesis of (E)-4-Methyl-N-(2-(3-oxobut-1-en-1-yl)phenyl)-N-(3-phenylprop-2-yn-1-yl)benzenesulfonamide 7r<sup>1</sup>**

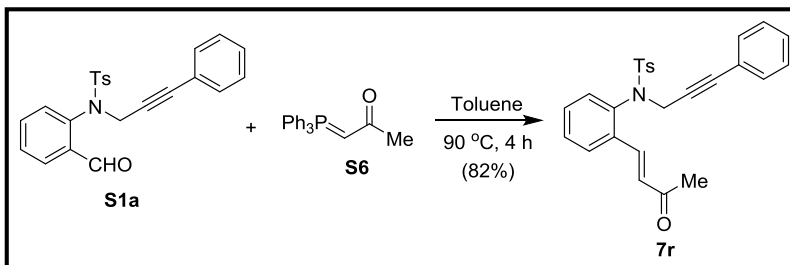

A mixture of aldehyde **S1a** (2 mmol, 1.0 equiv) and Wittig ylide **S6** (3 mmol, 1.5 equiv) in toluene (10 mL) was heated at 90 °C for 5 h. After cooling, the solvent was evaporated to dryness and the residue was treated with ether. The solidified OPPh<sub>3</sub> was removed by filtration and the filtrate was concentrated to afford the crude product, which was purified by flash column chromatography eluting with petroleum ether-ethyl acetate mixture (85:15, v/v) to obtain the pure compound **7r**.



**(*E*)-4-Methyl-*N*-(2-(3-oxobut-1-en-1-yl)phenyl)-*N*-(3-phenylprop-2-yn-1-yl)benzenesulfonamide (7r):**<sup>1</sup>

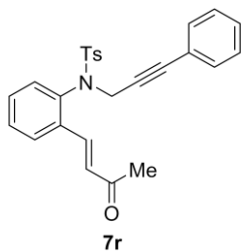

Pale yellow solid; mp 139-140 °C; yield: 0.704 g, 82%; <sup>1</sup>H NMR (300 MHz, CDCl<sub>3</sub>): δ 2.24 (s, 3H), 2.35 (s, 3H), 4.57 (s, 2H), 6.54 (d, *J* = 16.5 Hz, 1H), 6.98 (dd, *J* = 8.1, 1.2 Hz, 1H), 7.09 (dd, *J* = 8.1, 1.5 Hz, 2H), 7.15-7.29 (m, 6H), 7.34 (t, *J* = 7.5 Hz, 1H), 7.60 (d, *J* = 8.4 Hz, 2H), 7.68 (dd, *J* = 7.8, 1.2 Hz, 1H), 7.87 (d, *J* = 16.5 Hz, 1H); <sup>13</sup>C NMR (75 MHz, CDCl<sub>3</sub>): δ 21.6, 26.5, 42.8, 82.8, 86.0, 122.1, 127.2, 128.2, 128.3, 128.7, 129.4, 129.5, 129.6, 129.8, 130.8, 131.4, 135.9, 136.0, 138.7, 139.5, 144.2, 199.0.

## 5. Copies of $^1\text{H}$ and $^{13}\text{C}$ NMR Spectra

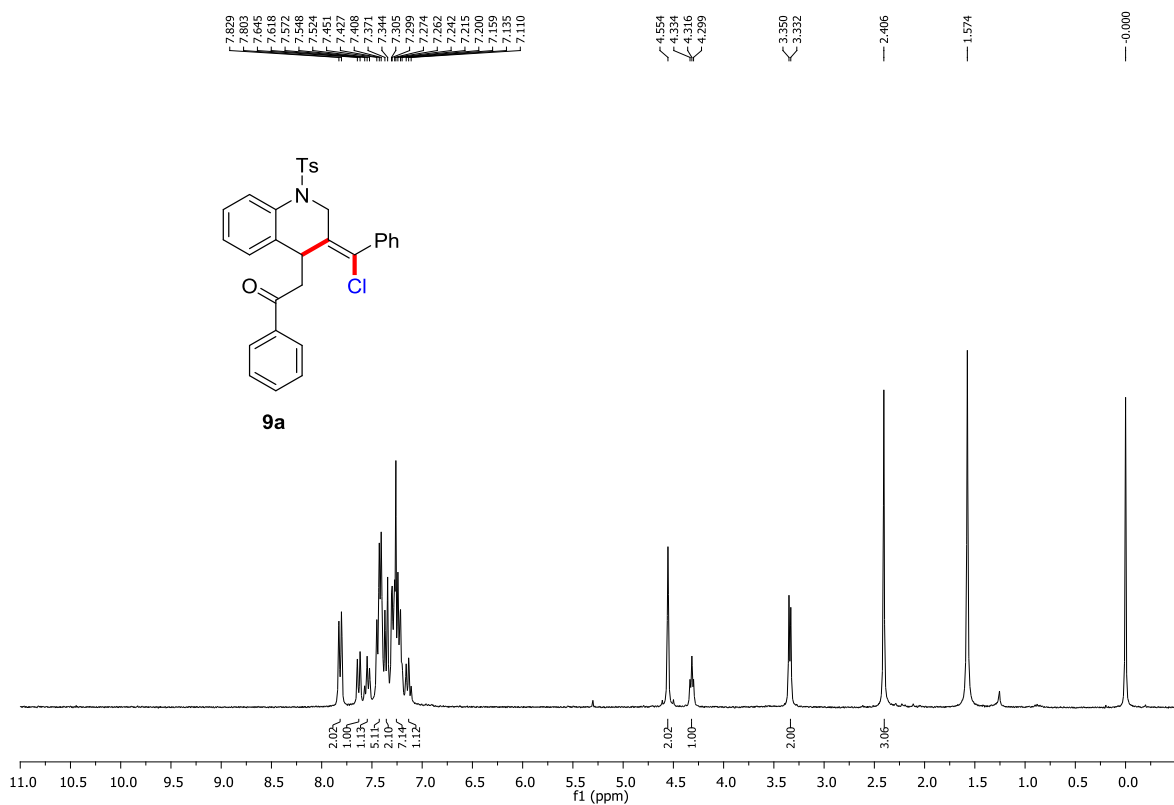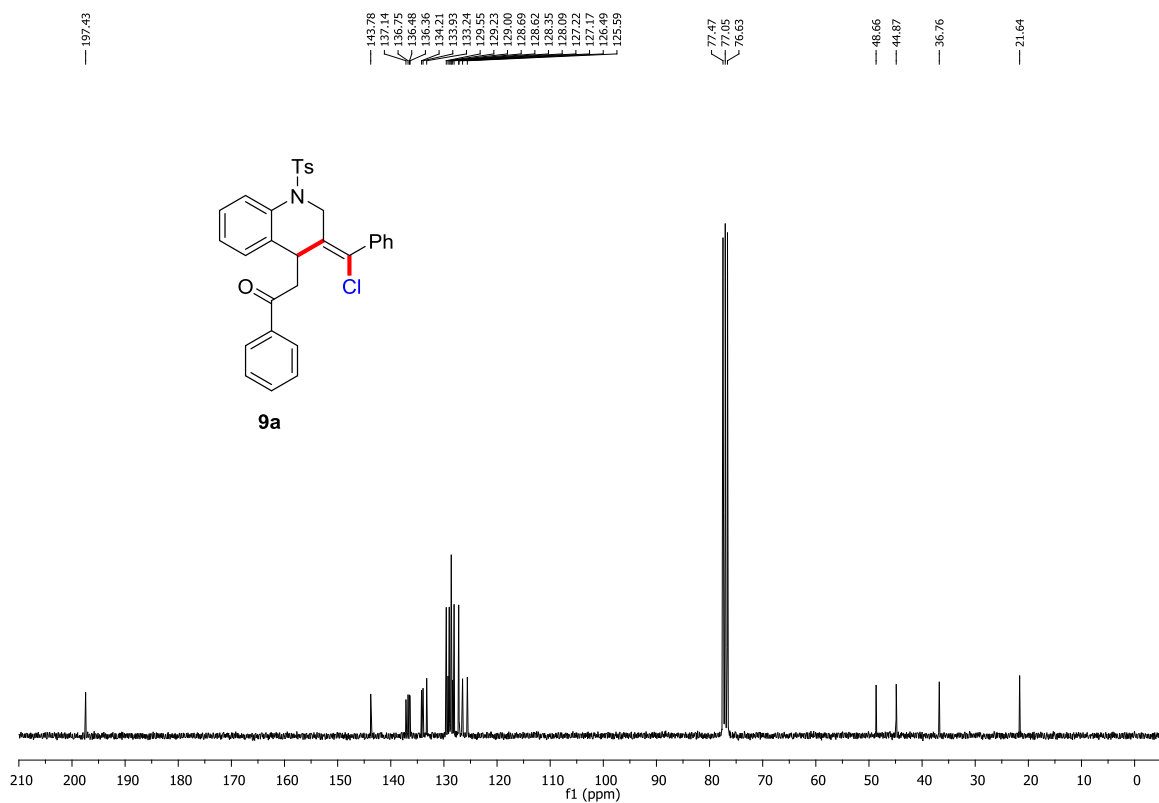

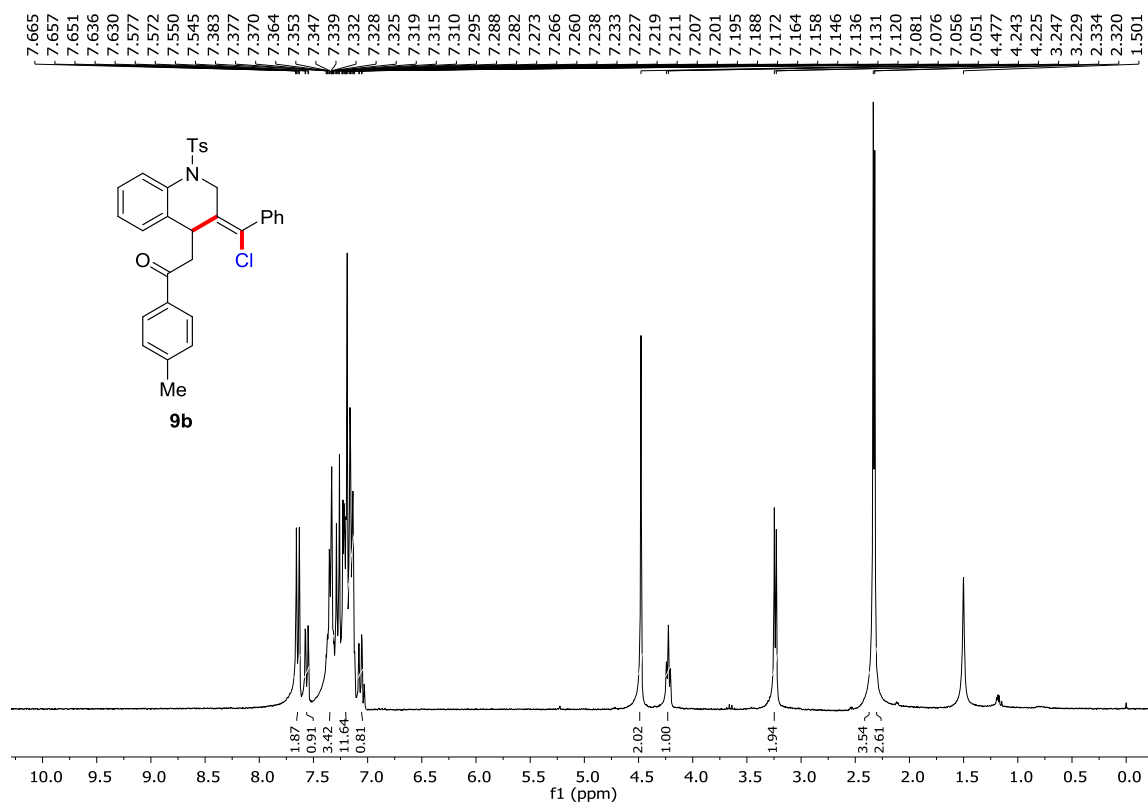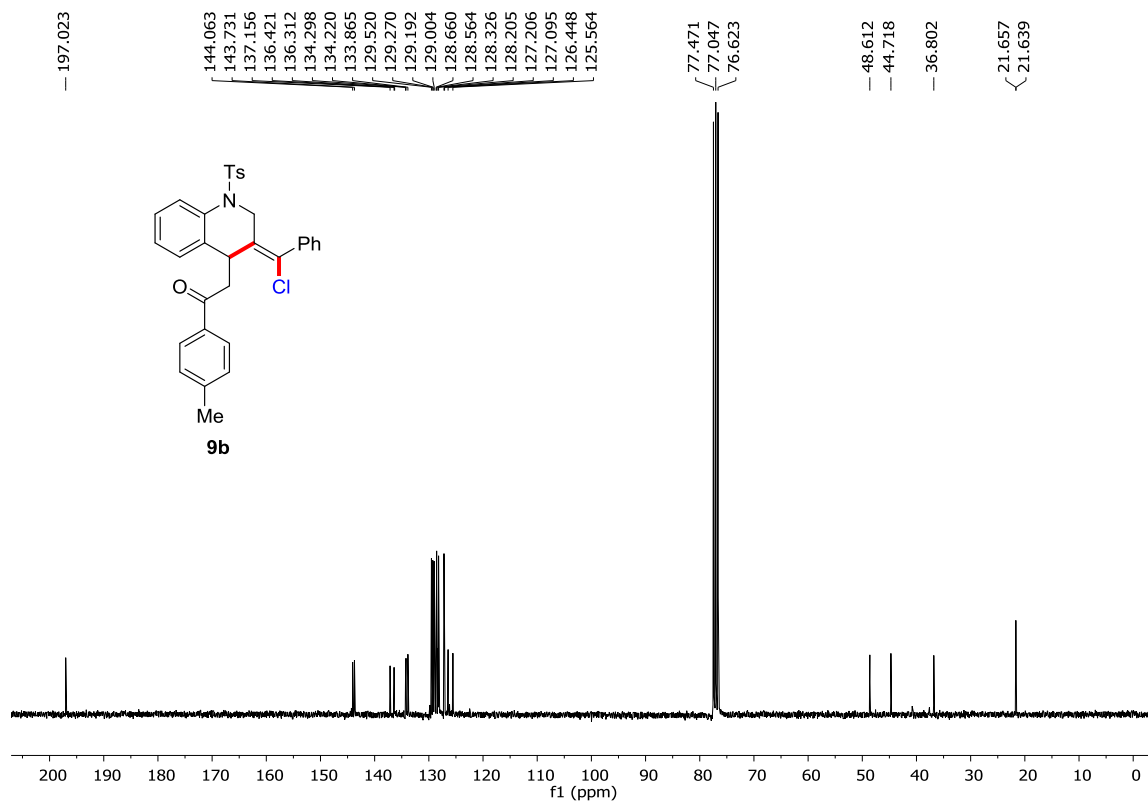

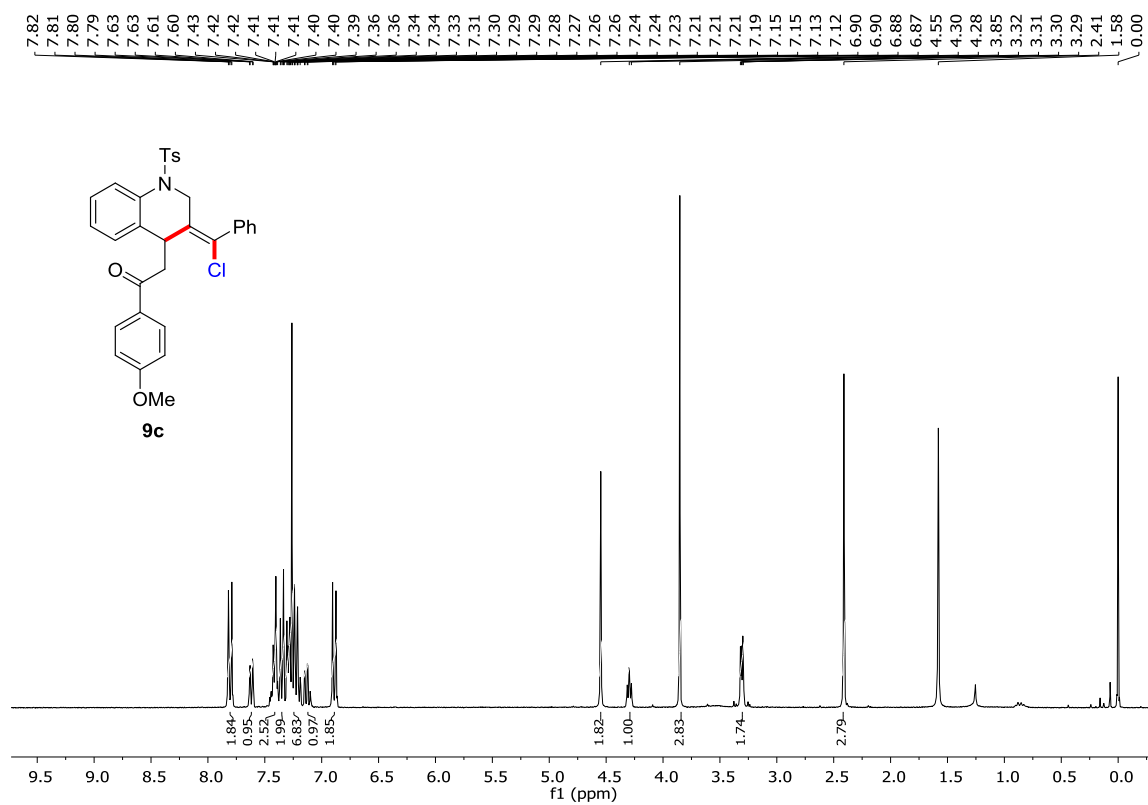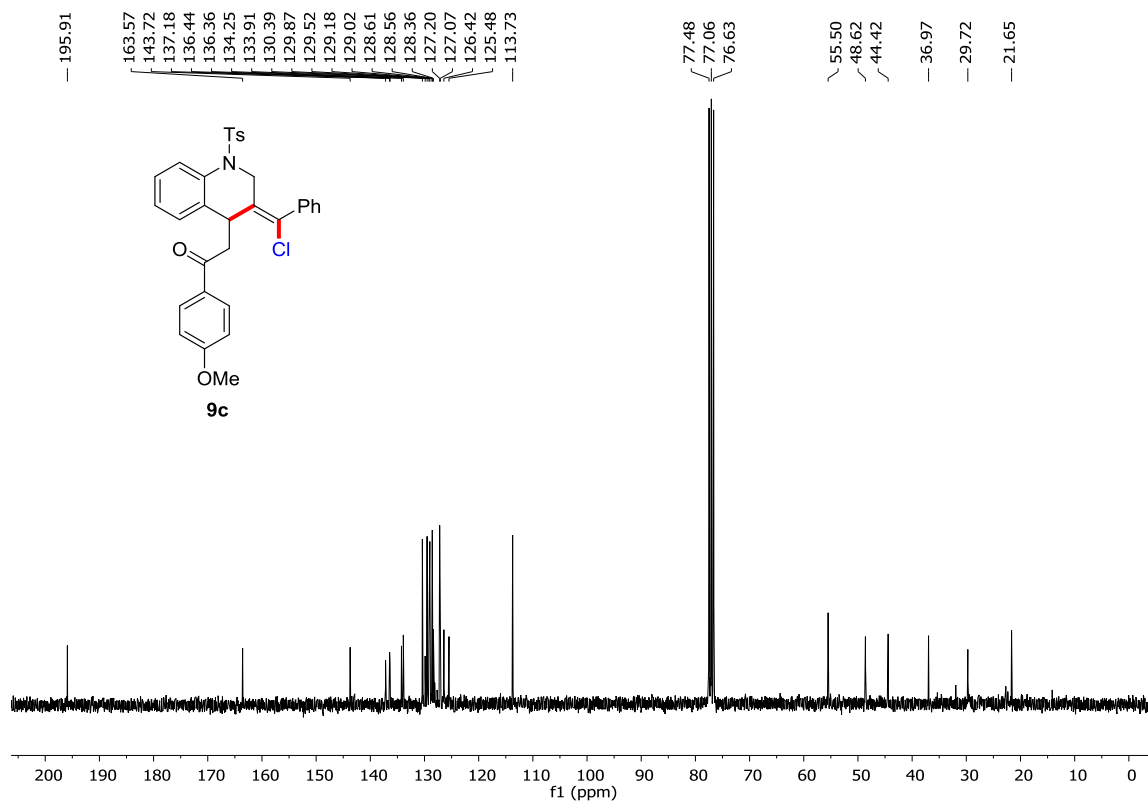

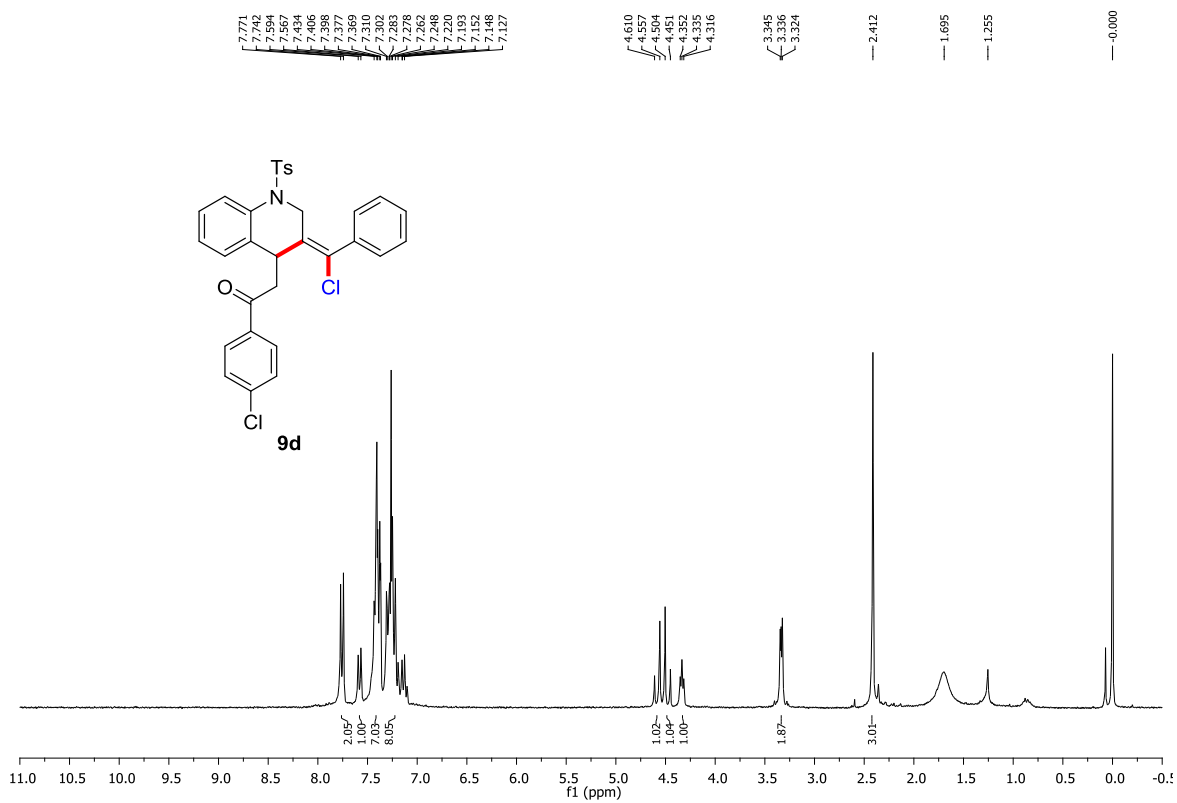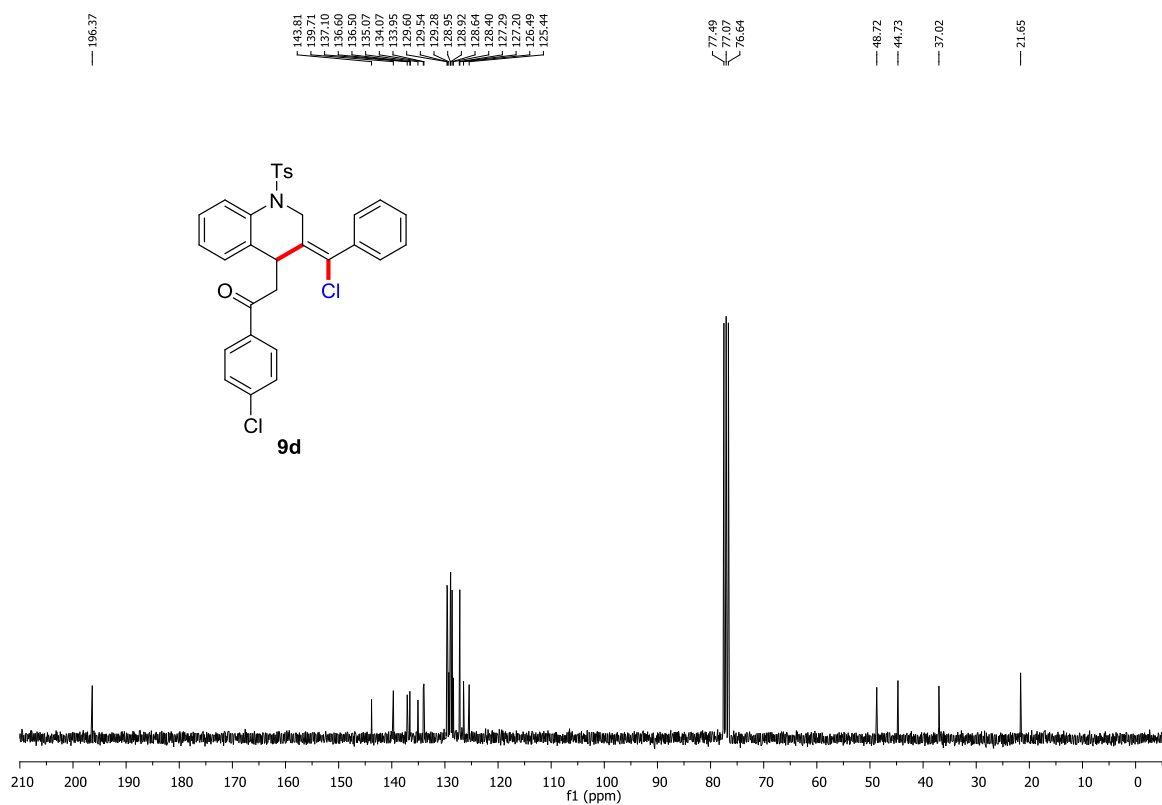

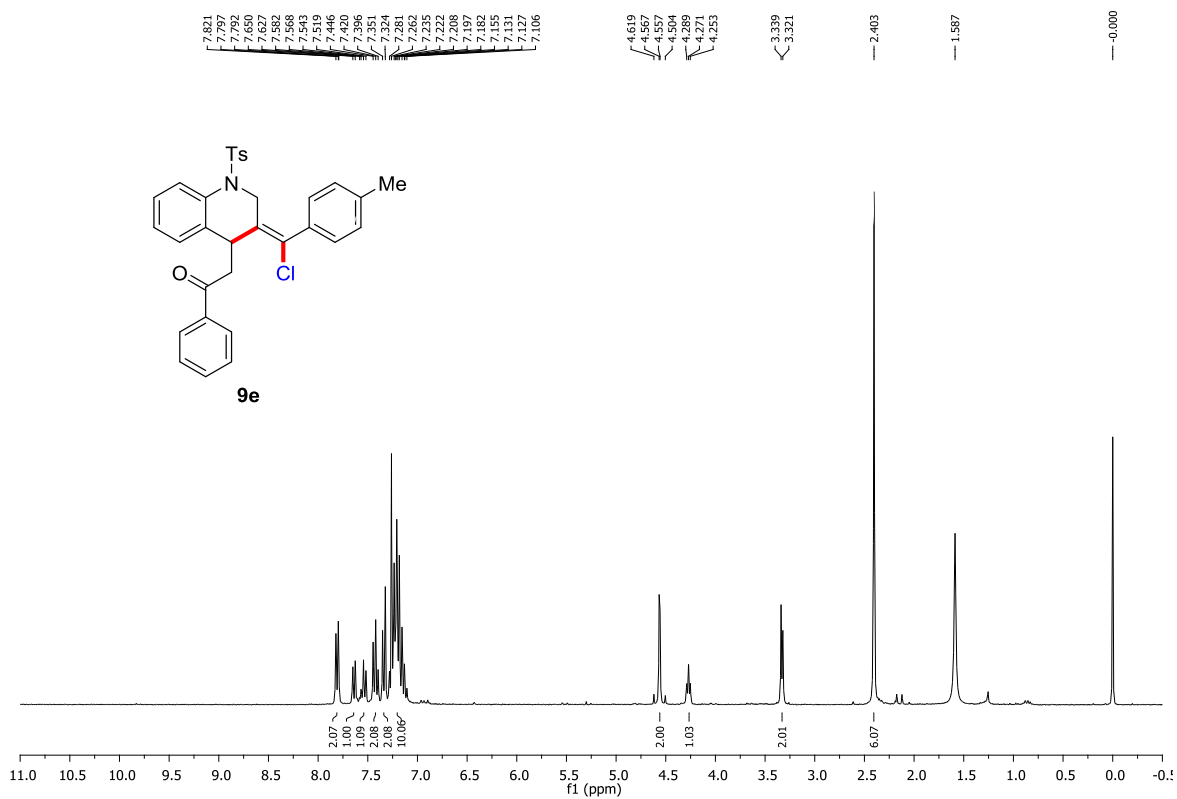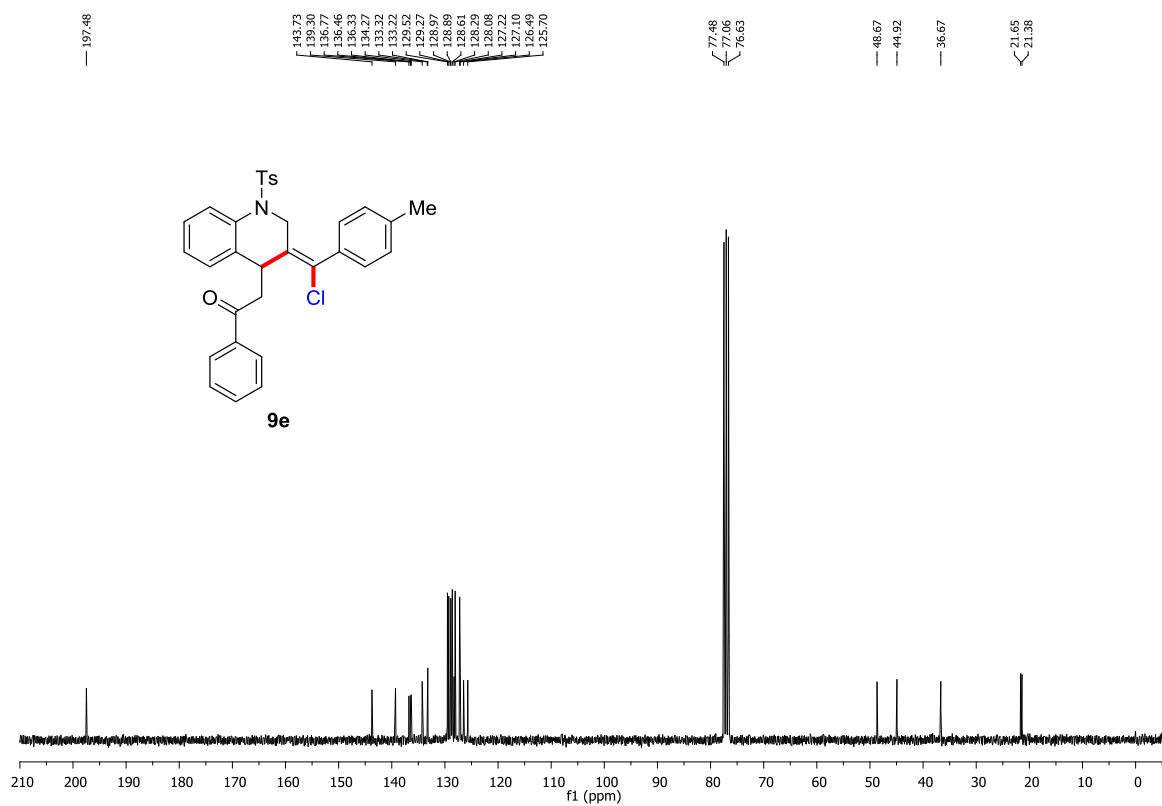

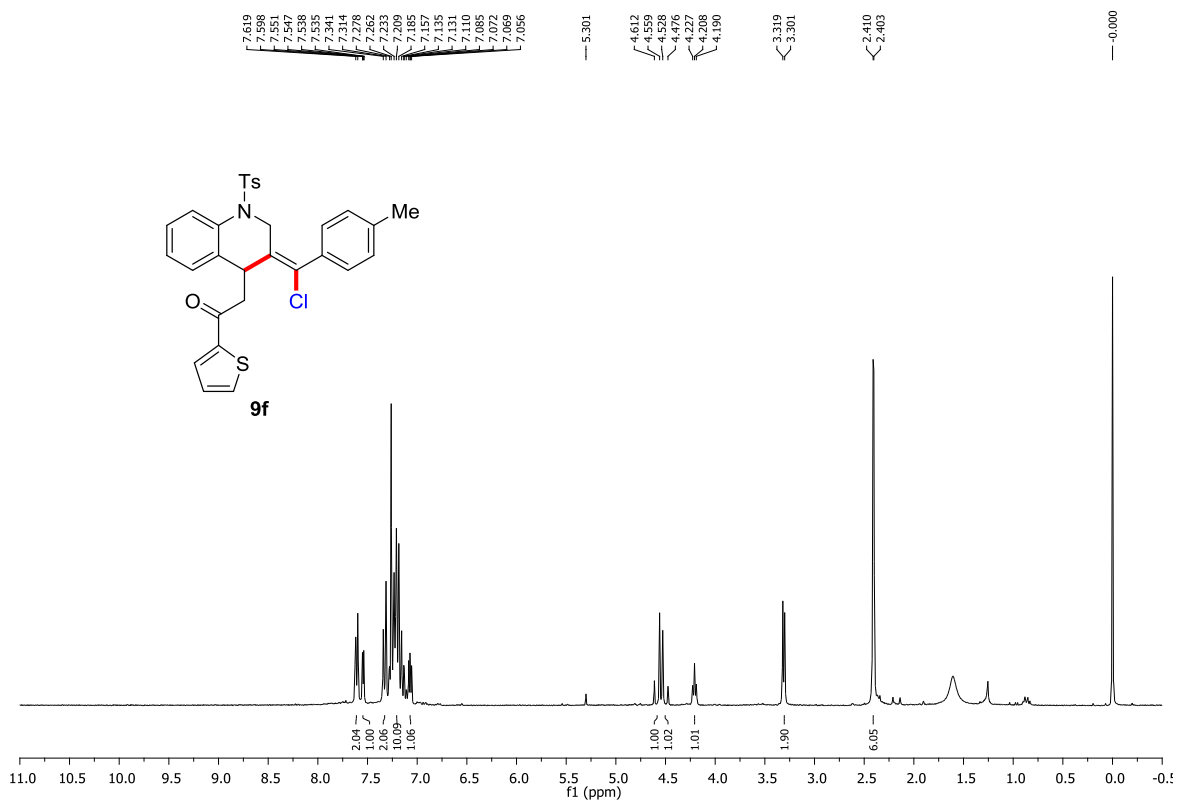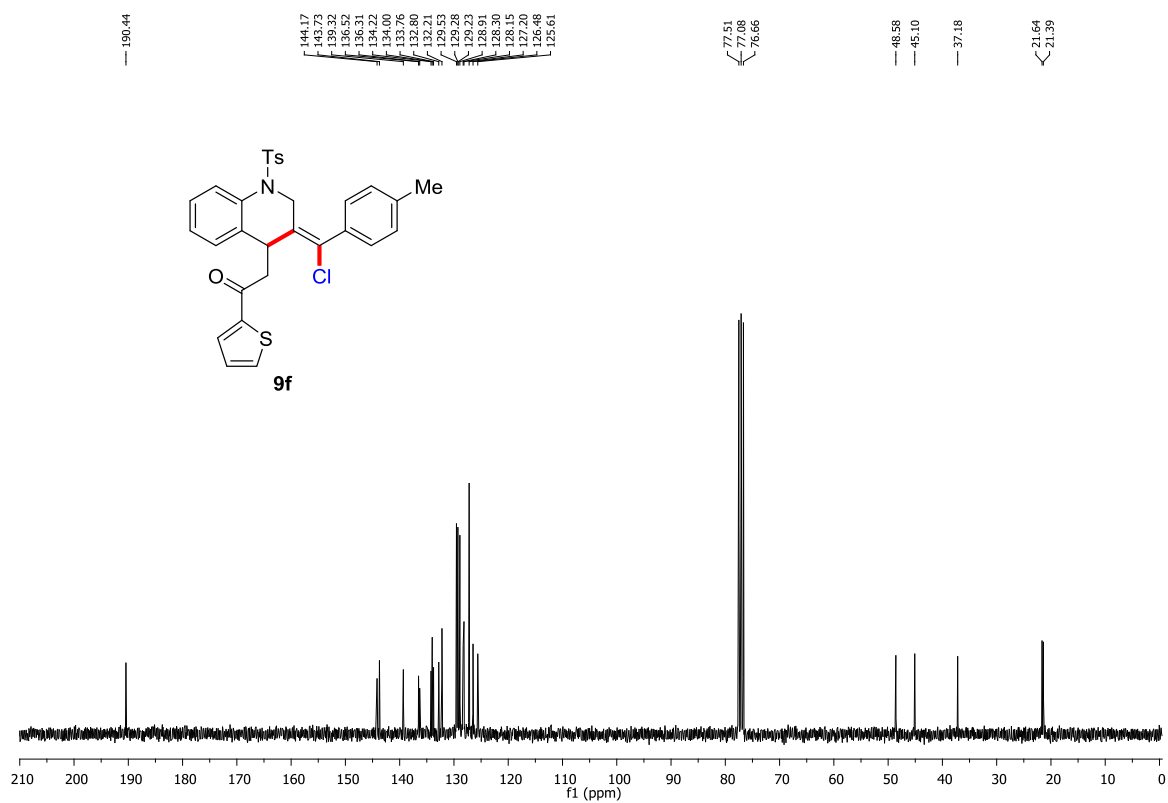

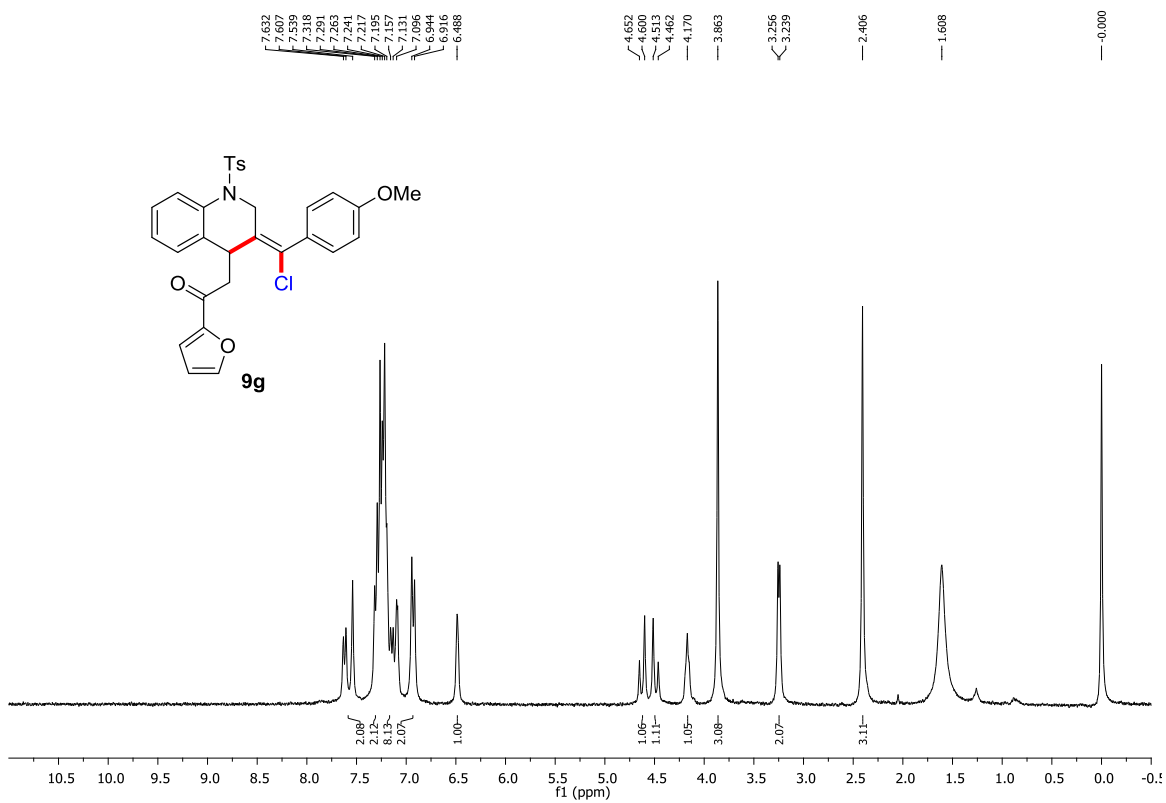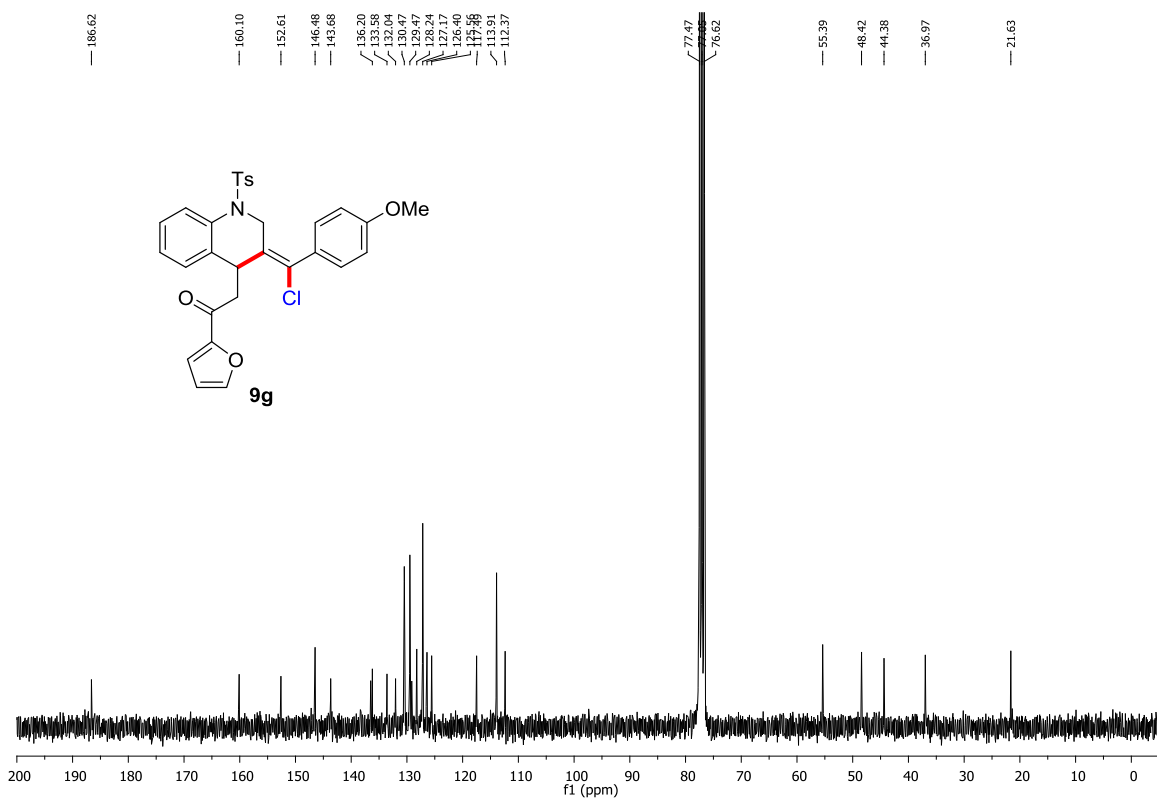



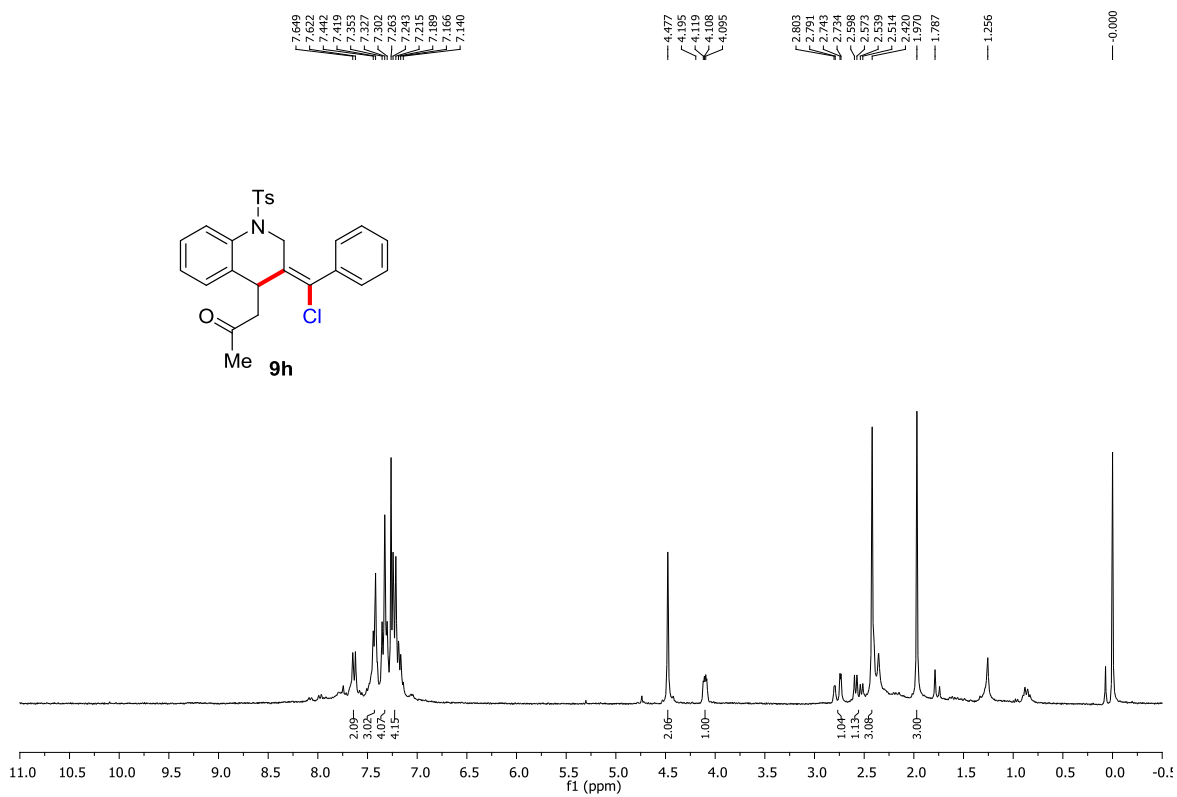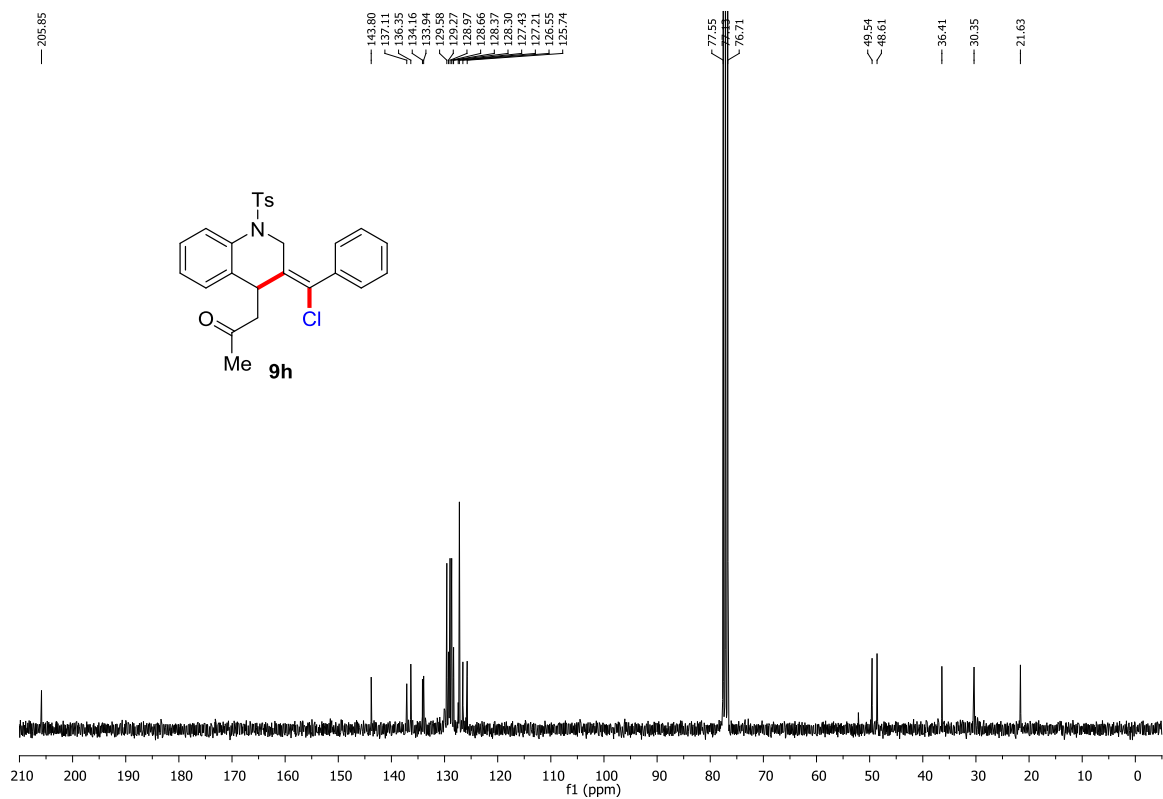

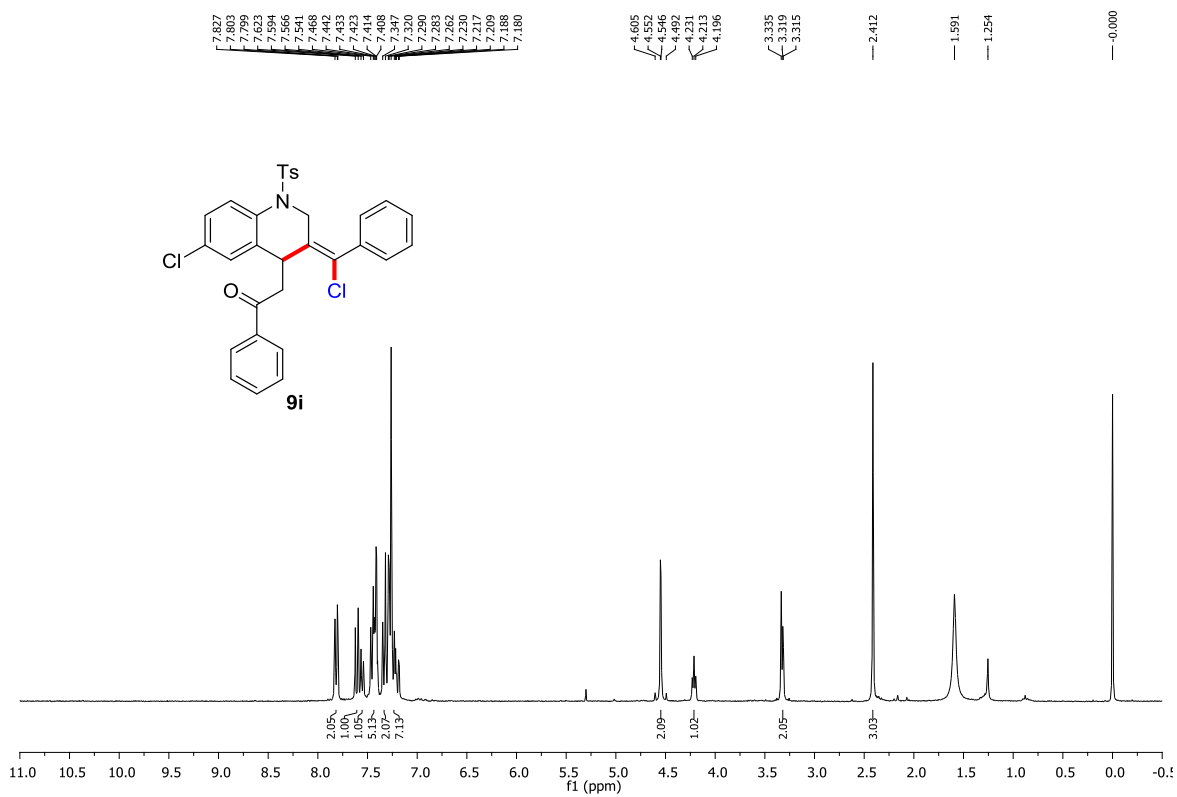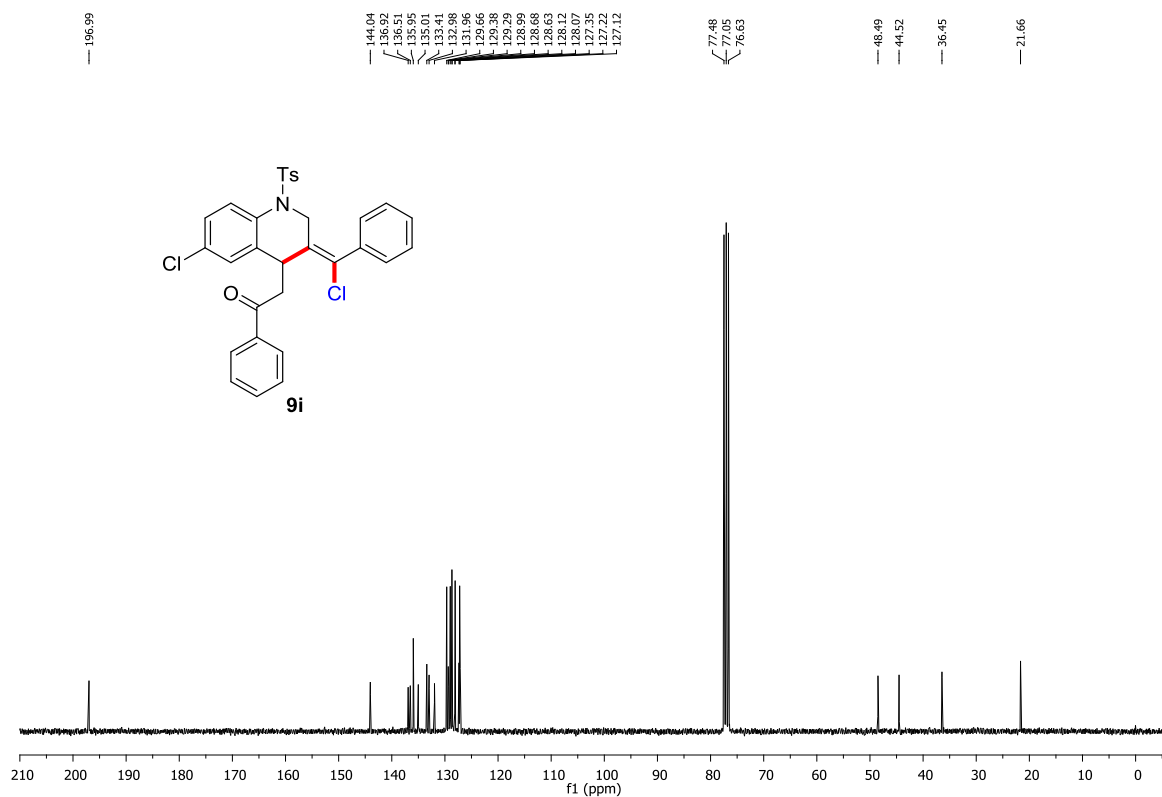

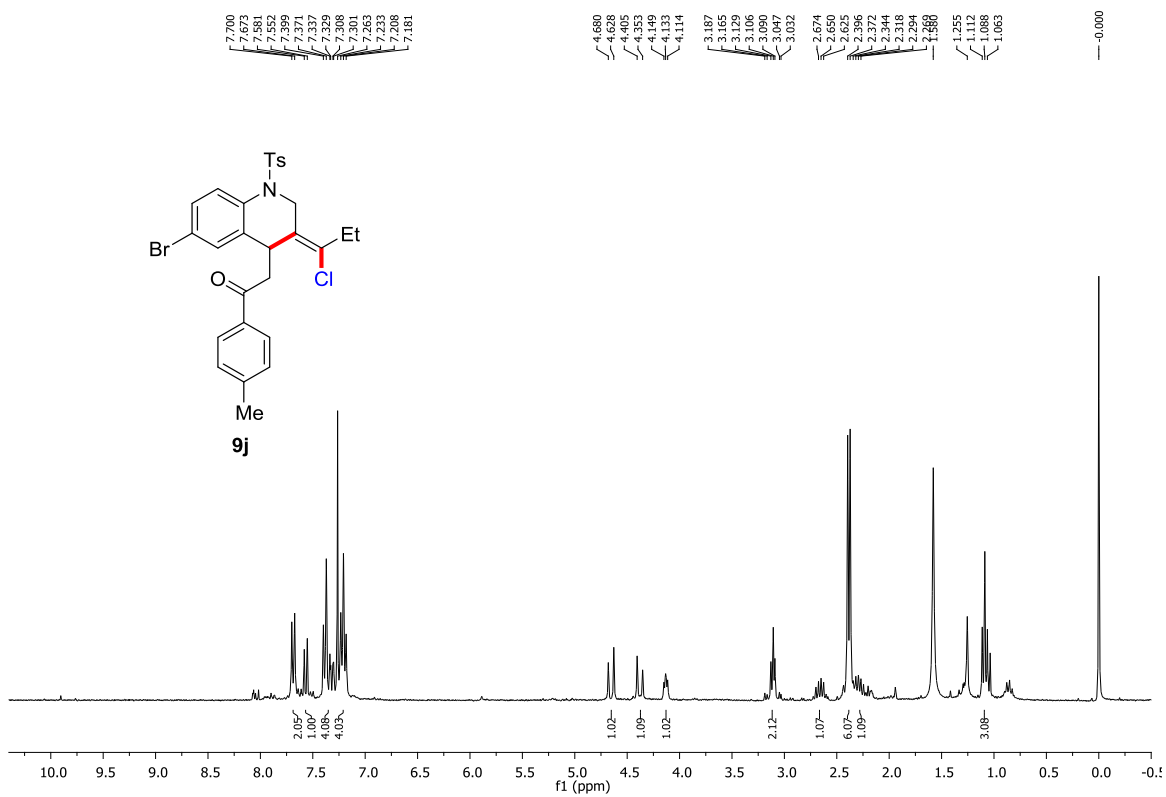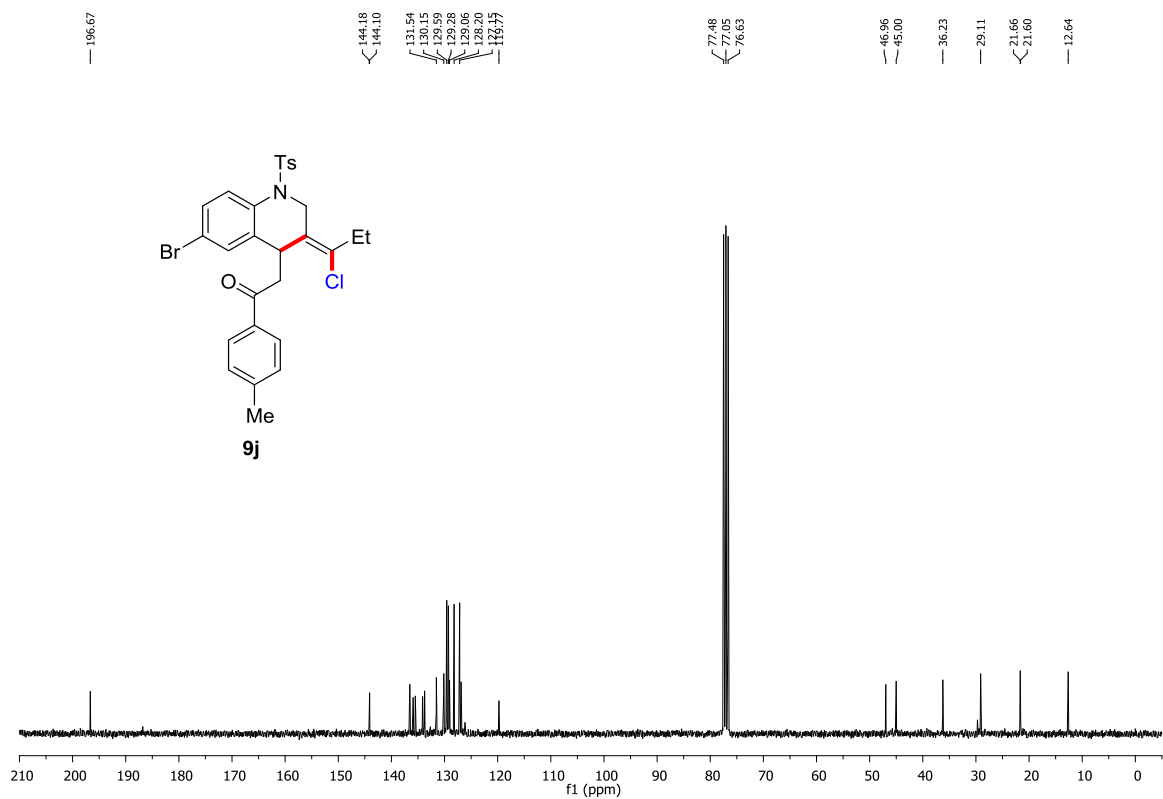

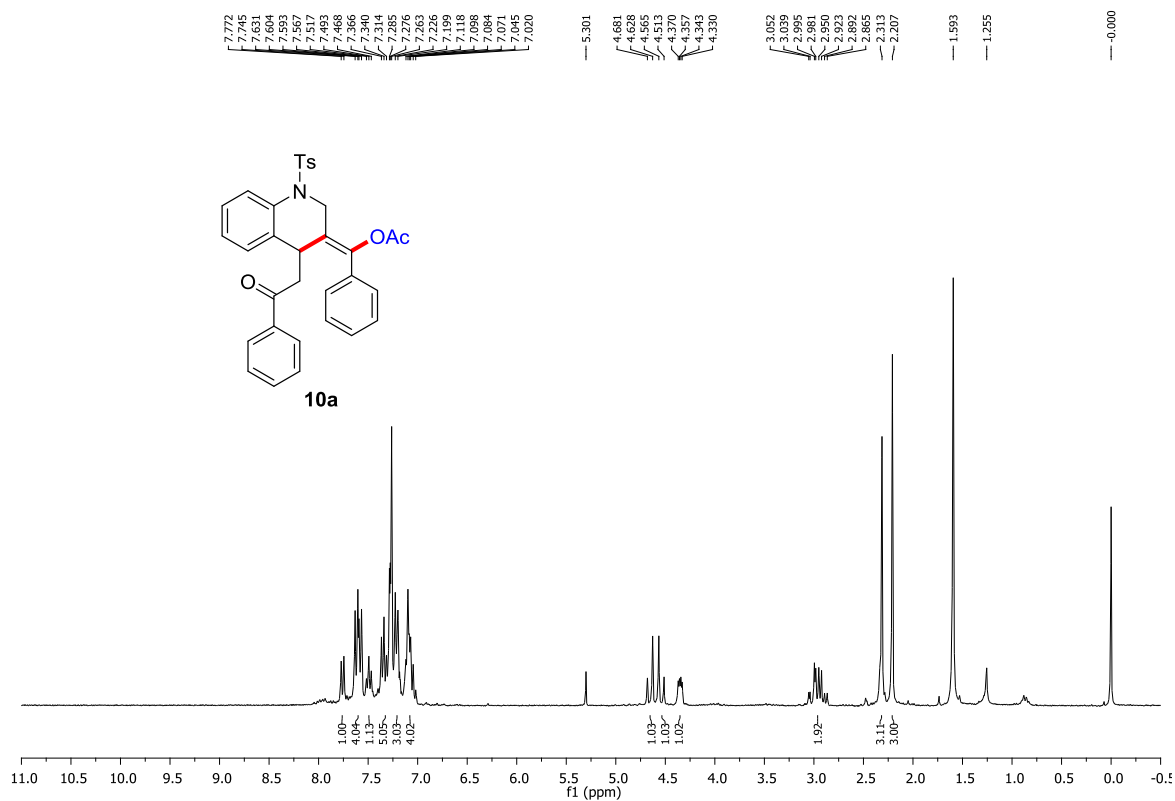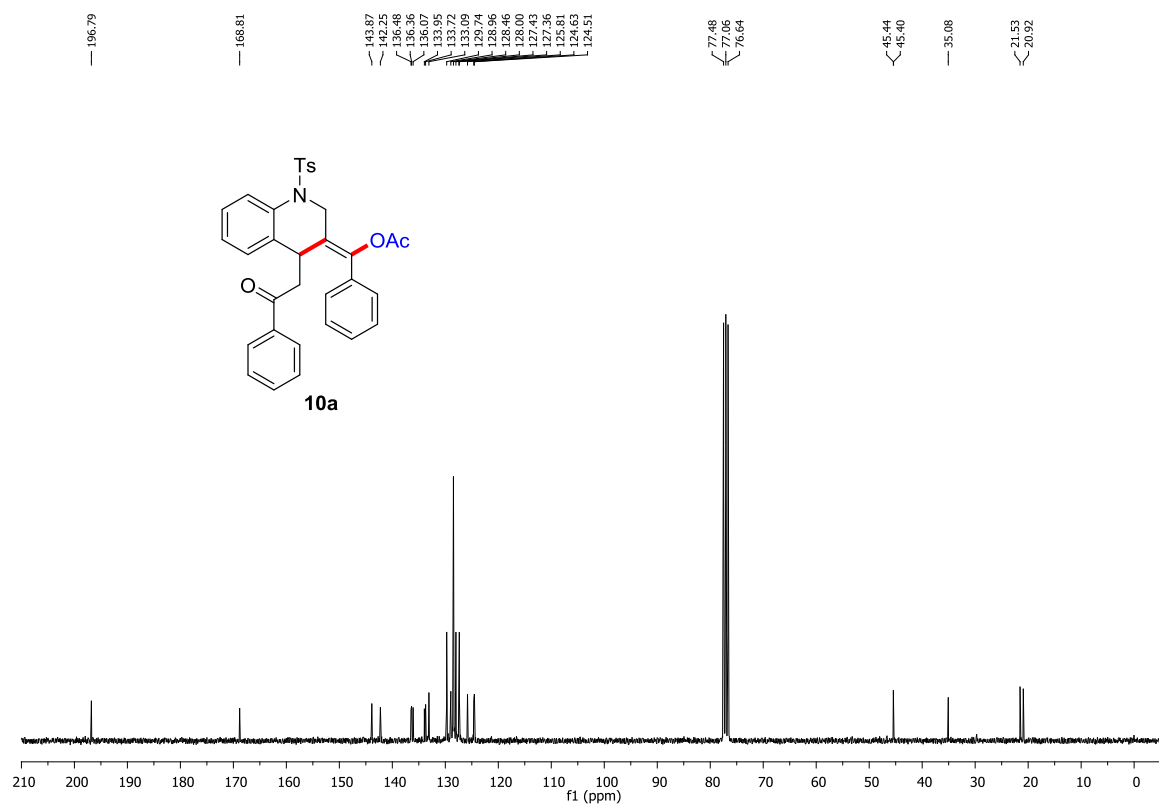

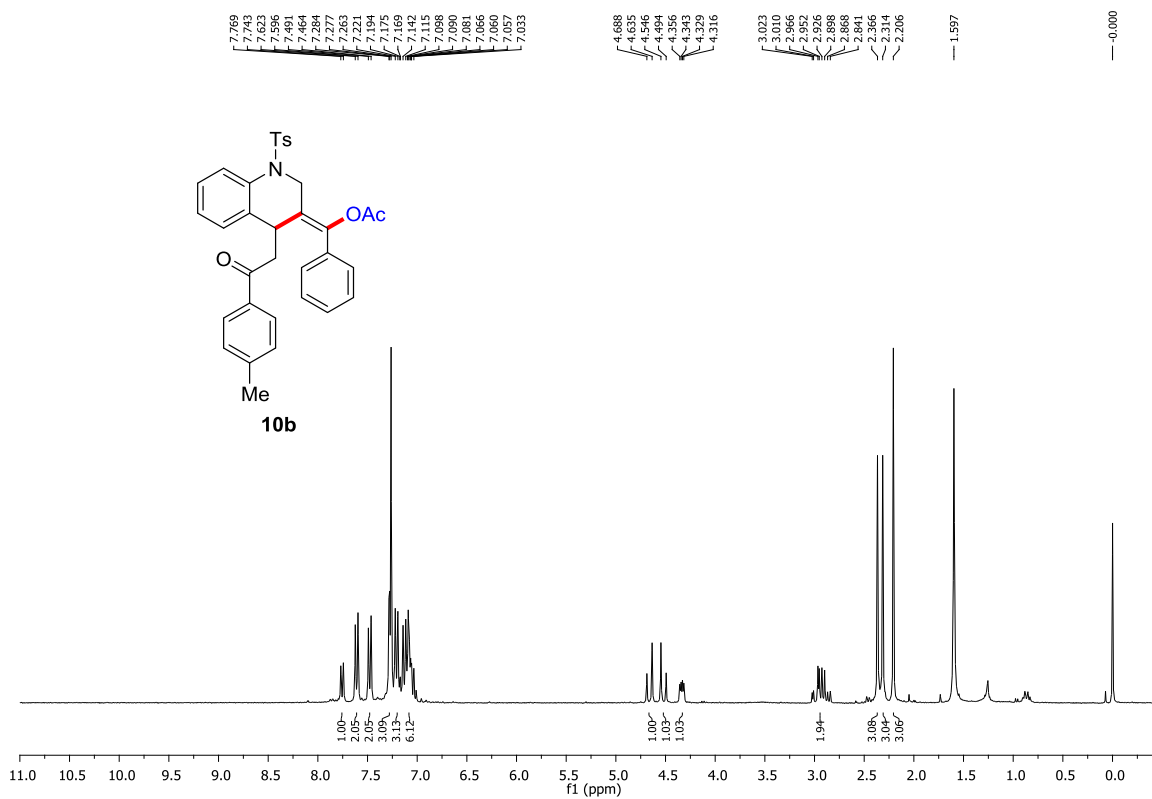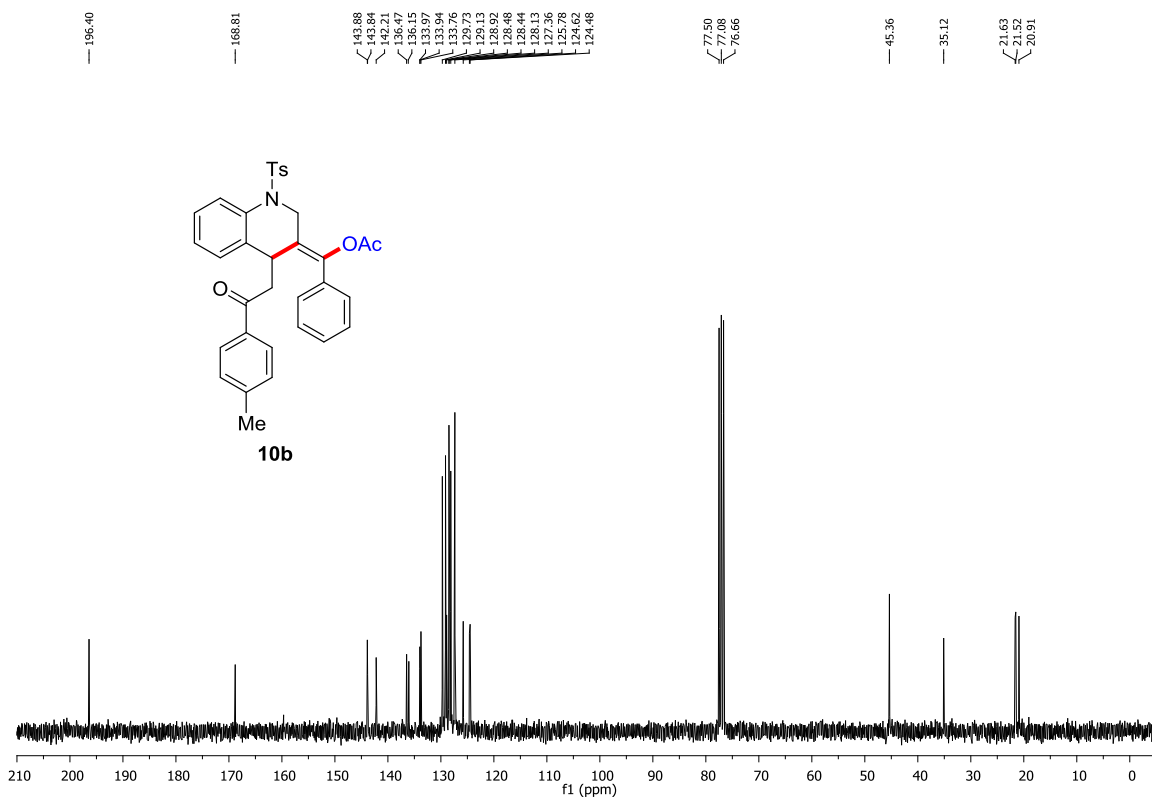

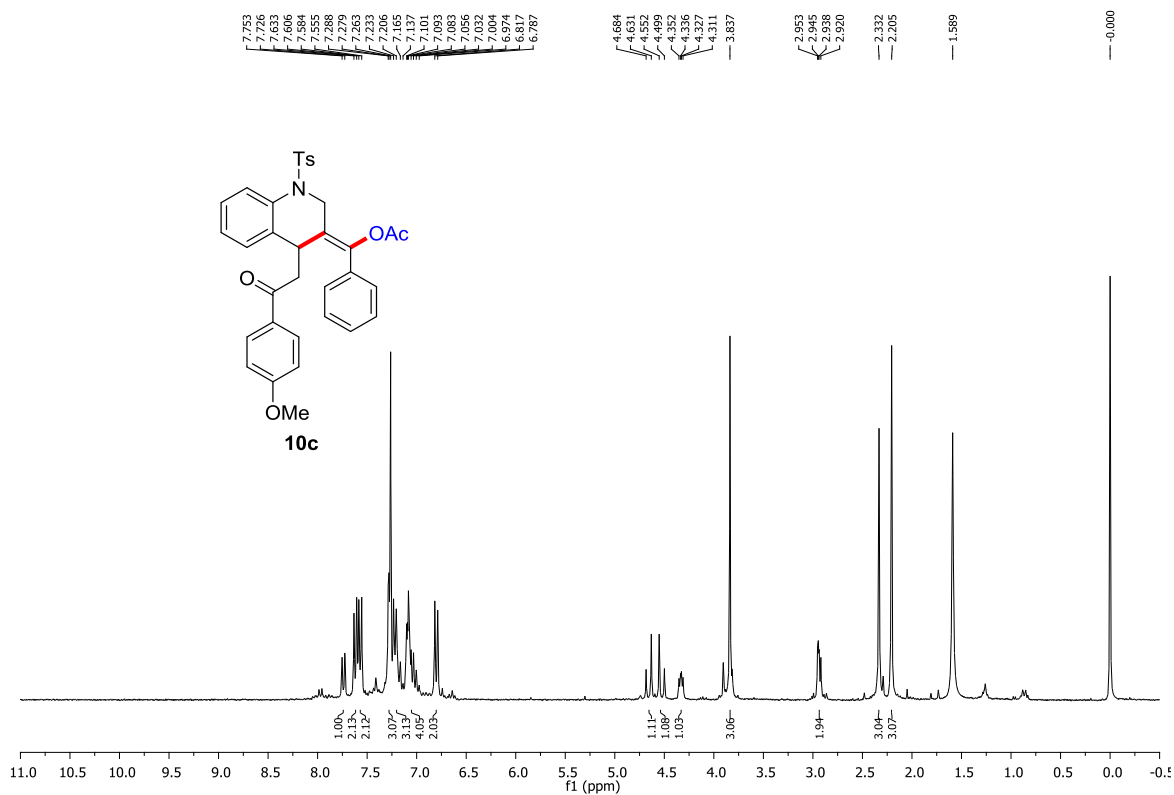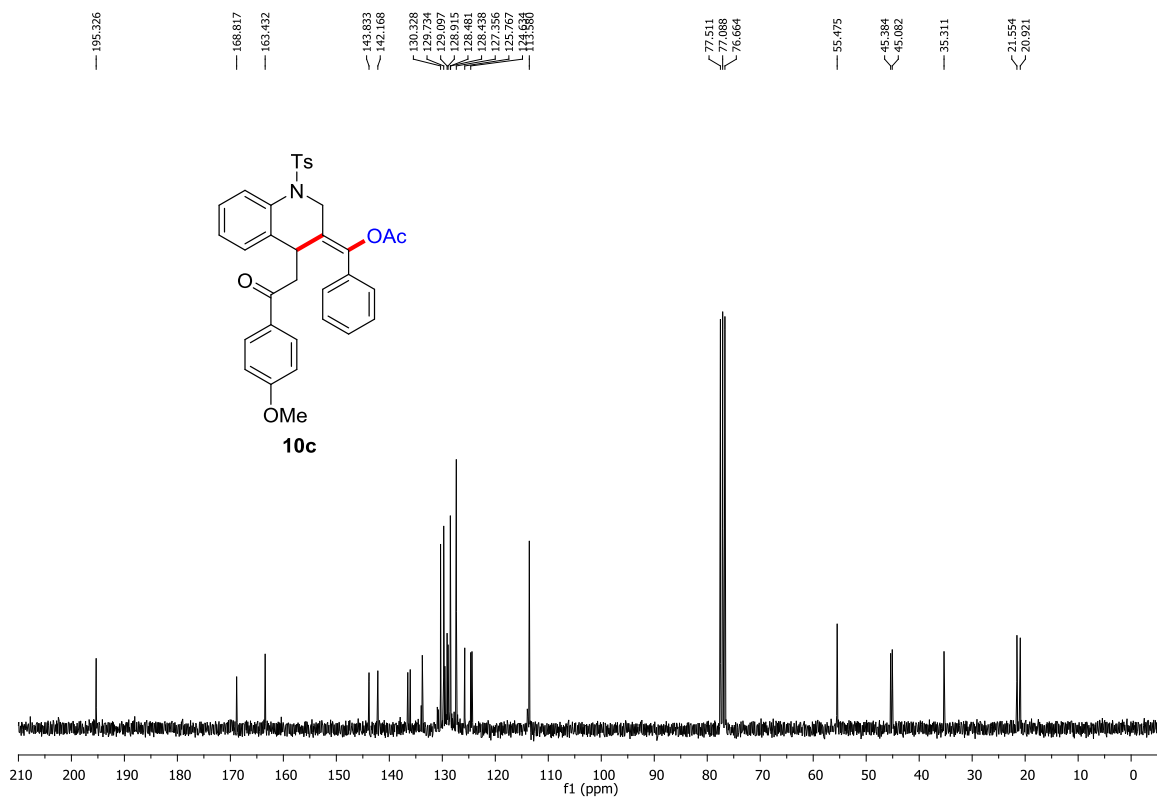

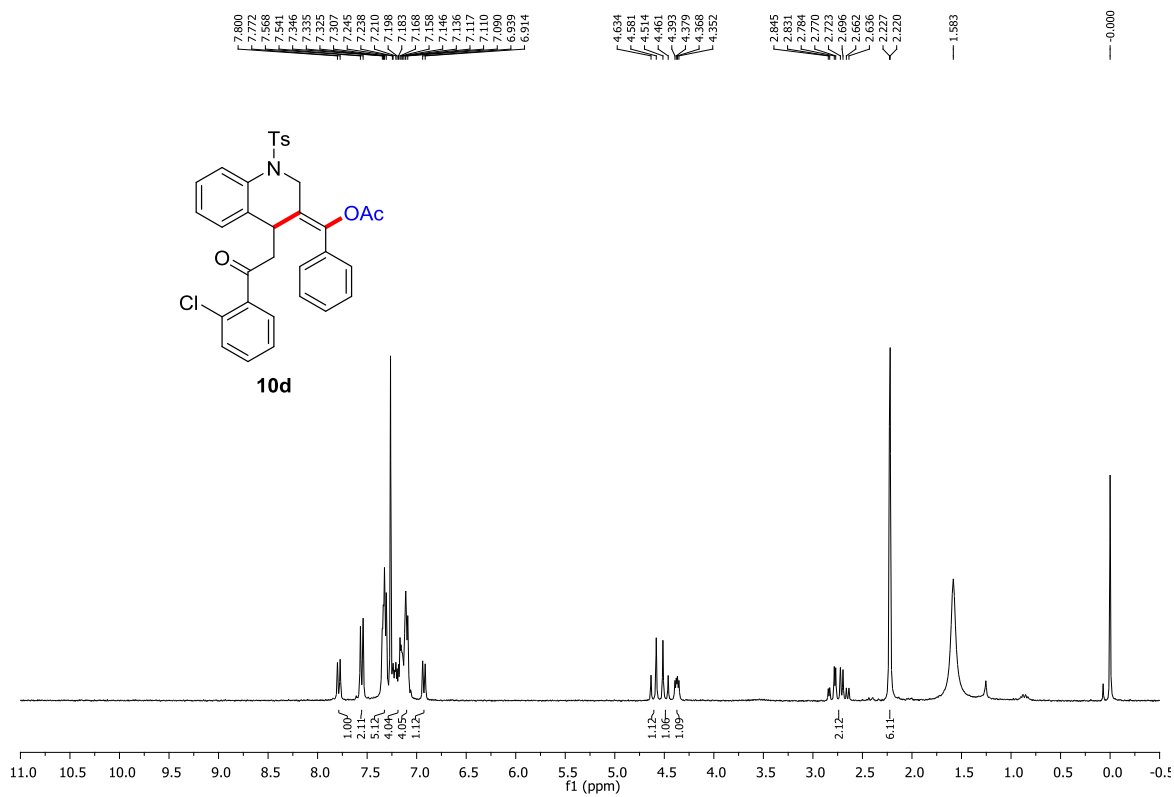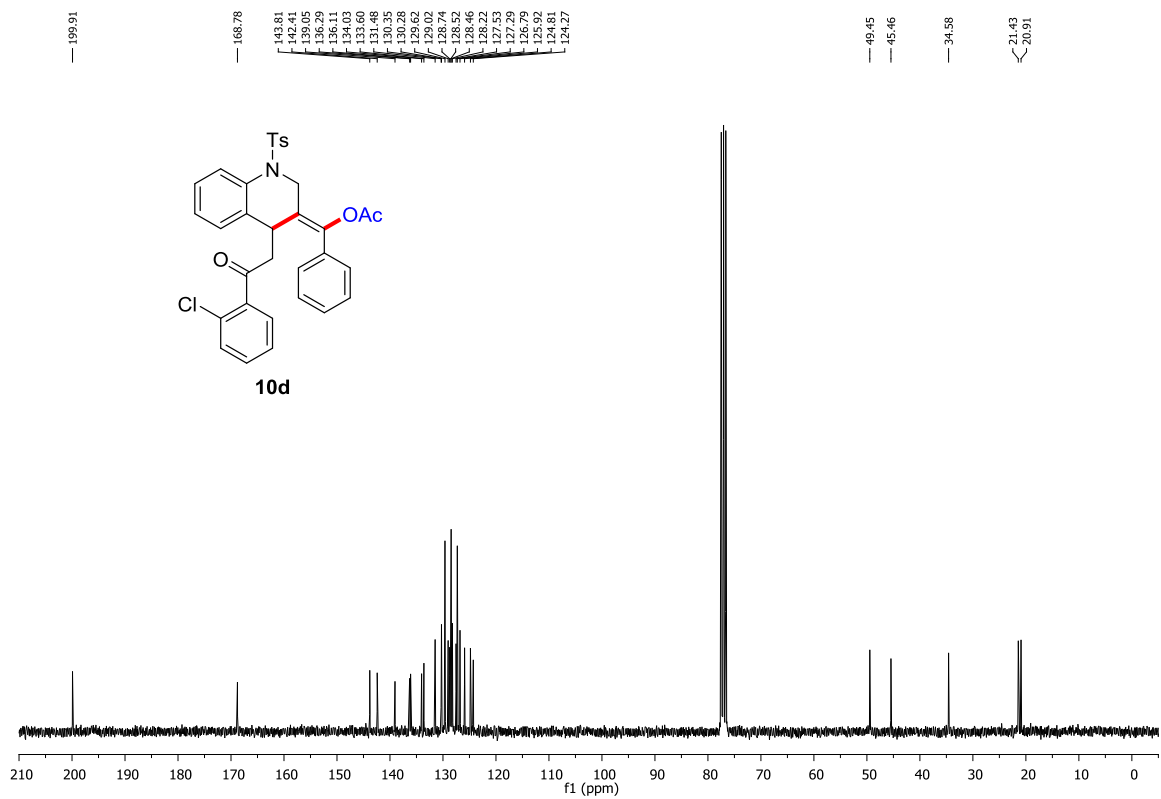

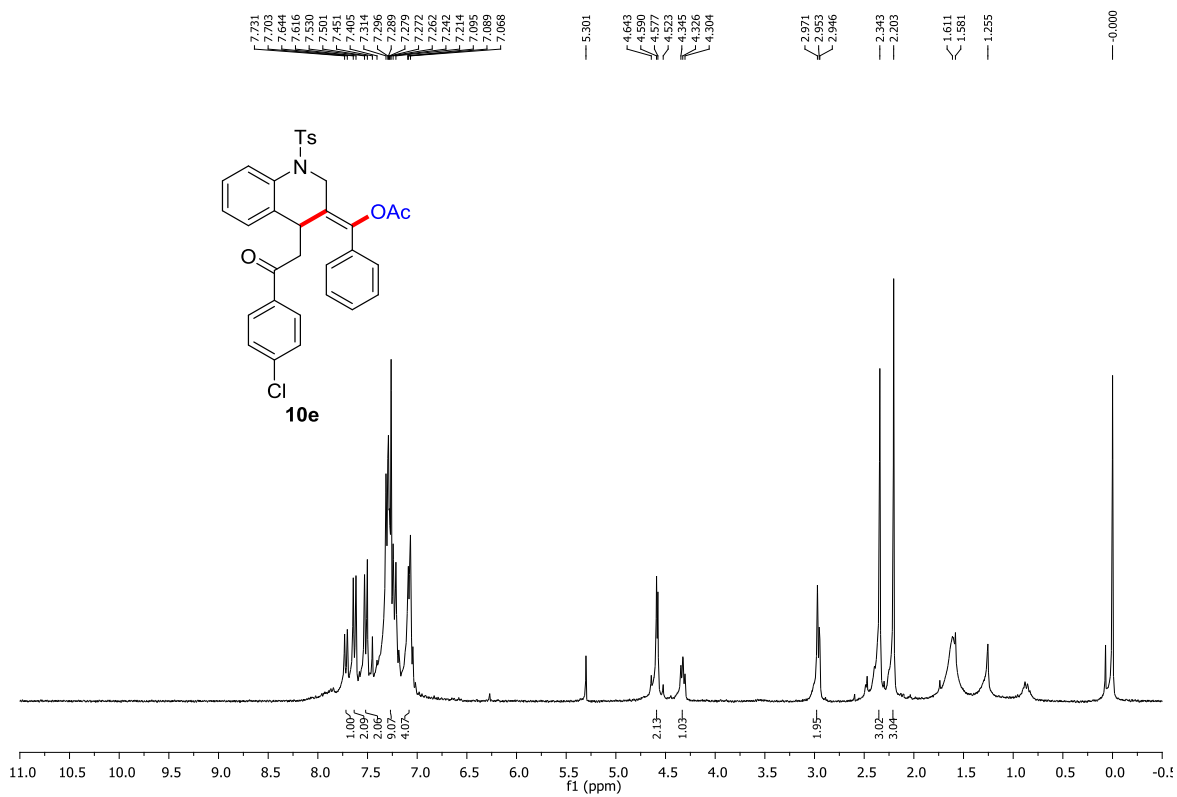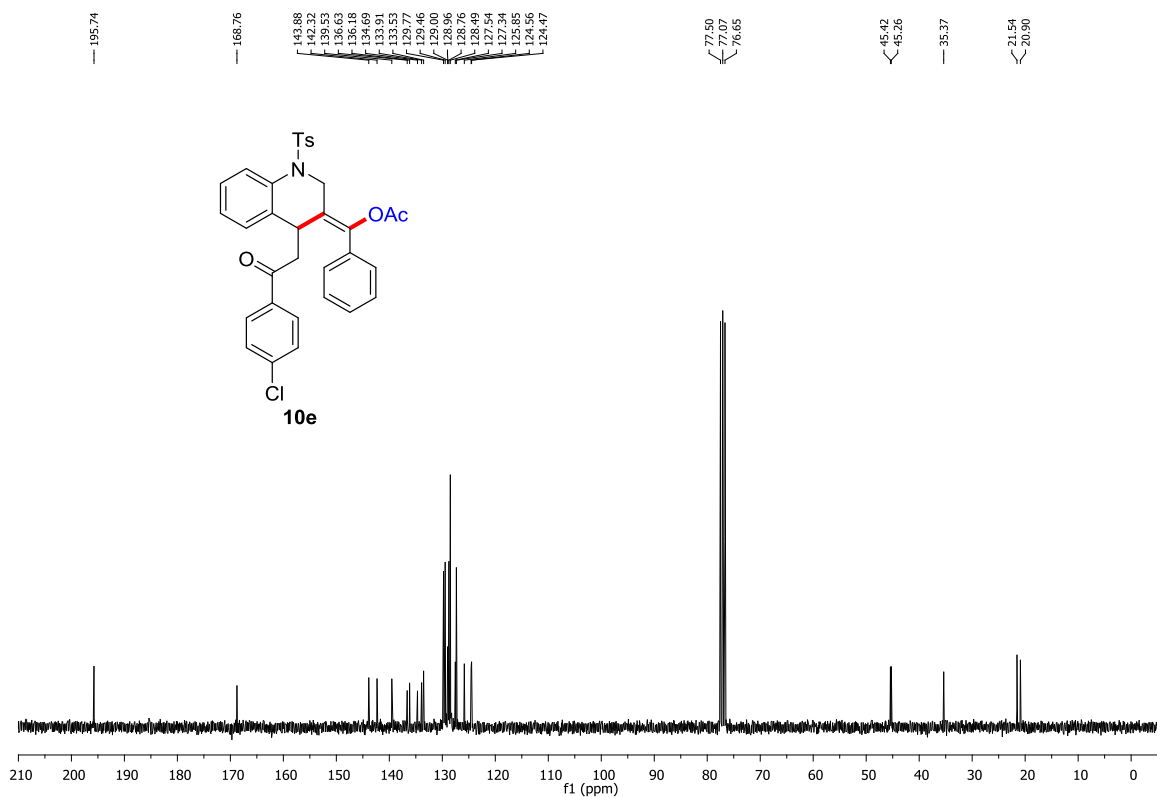



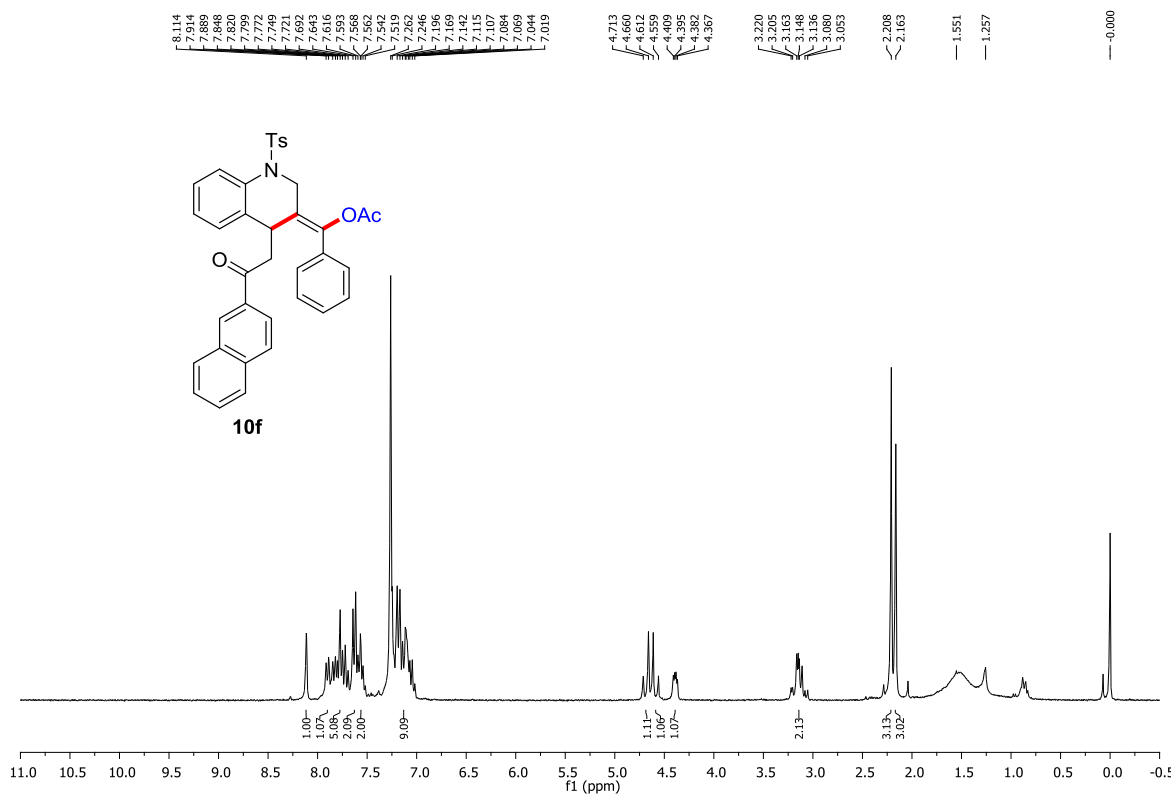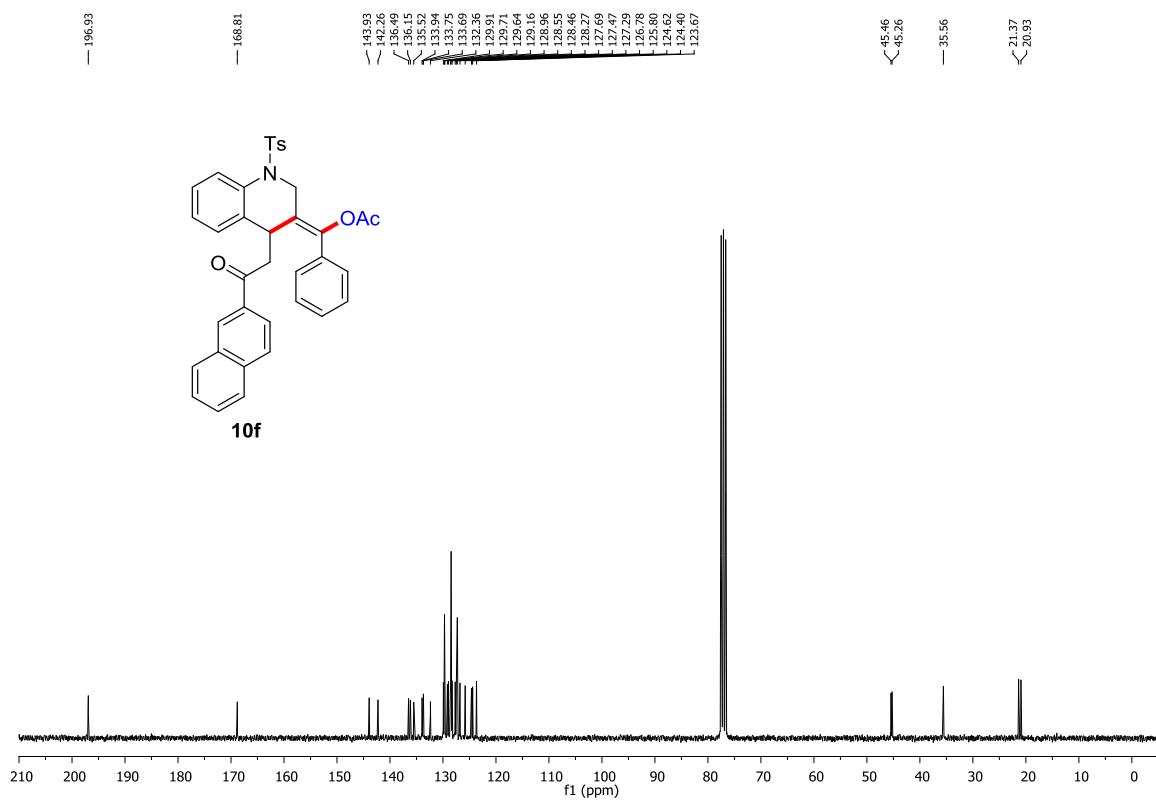

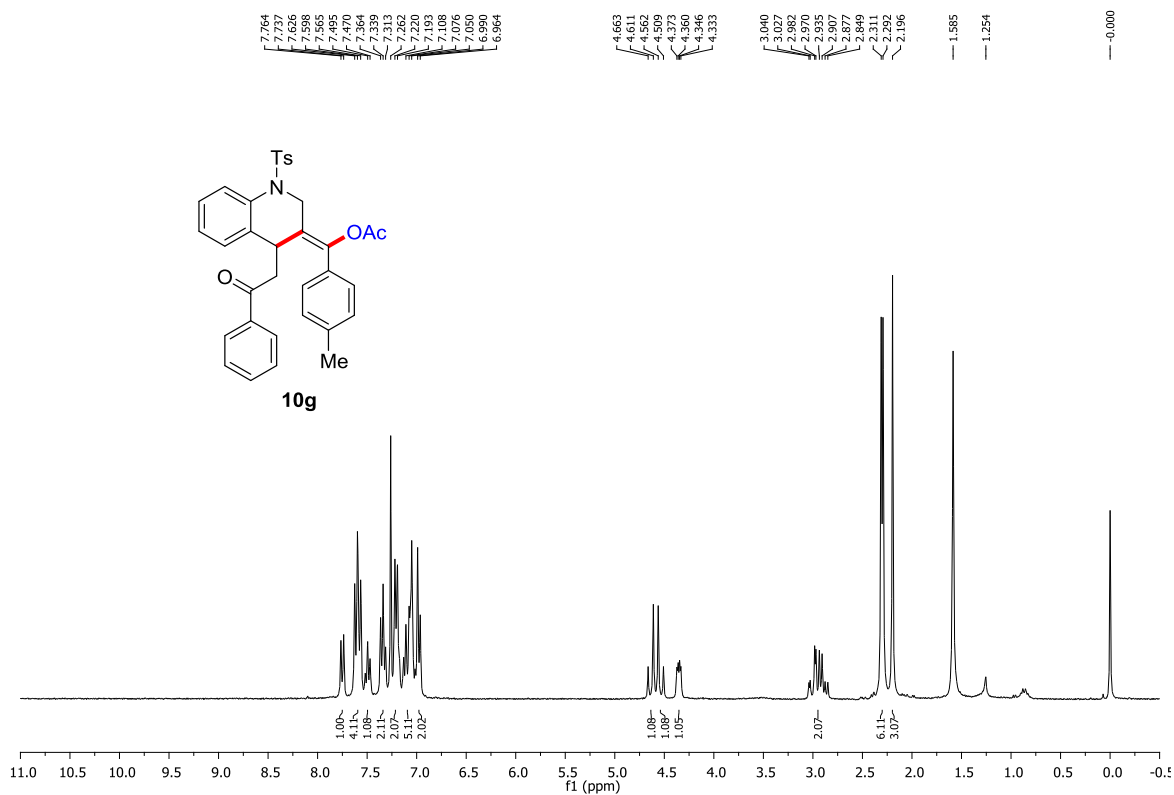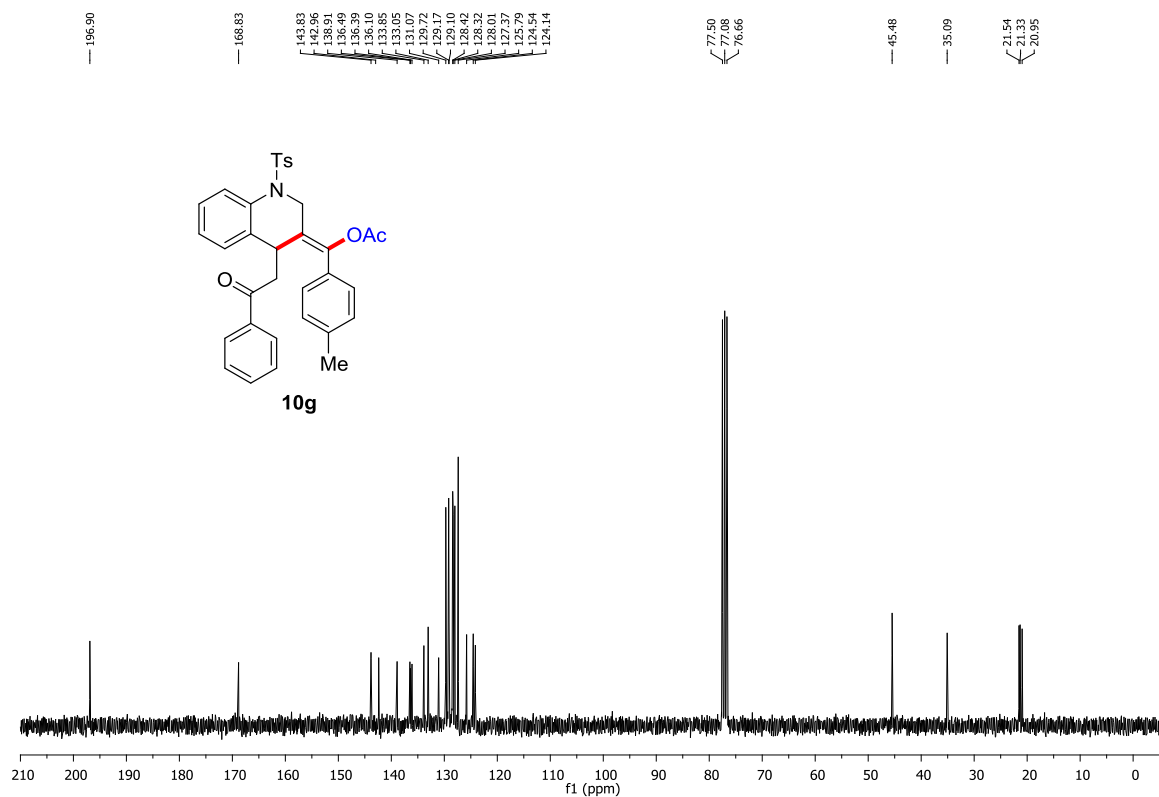

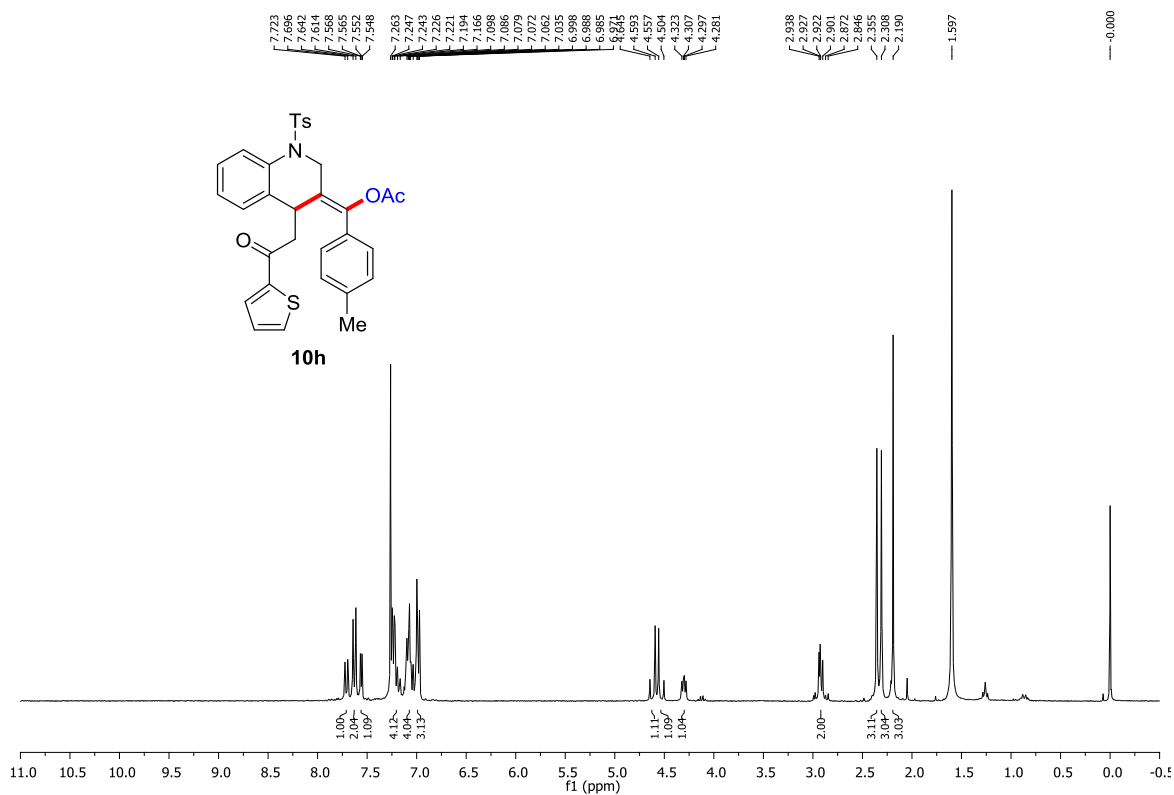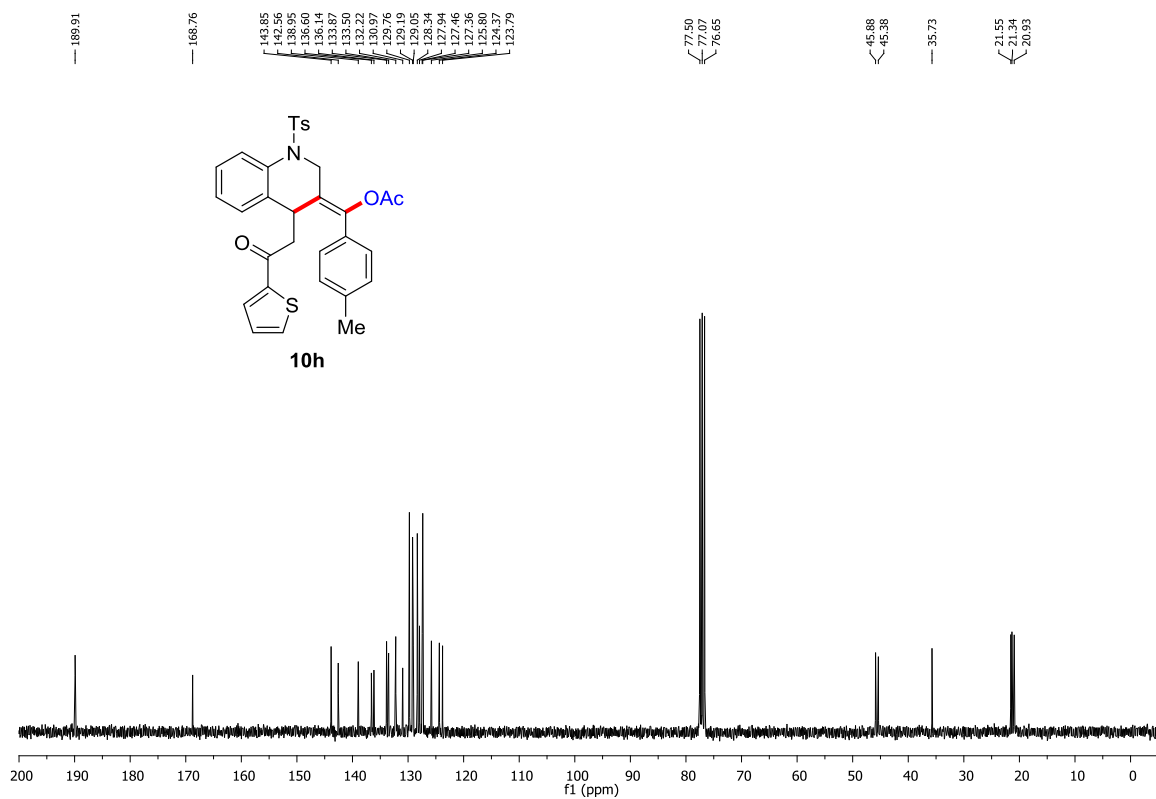

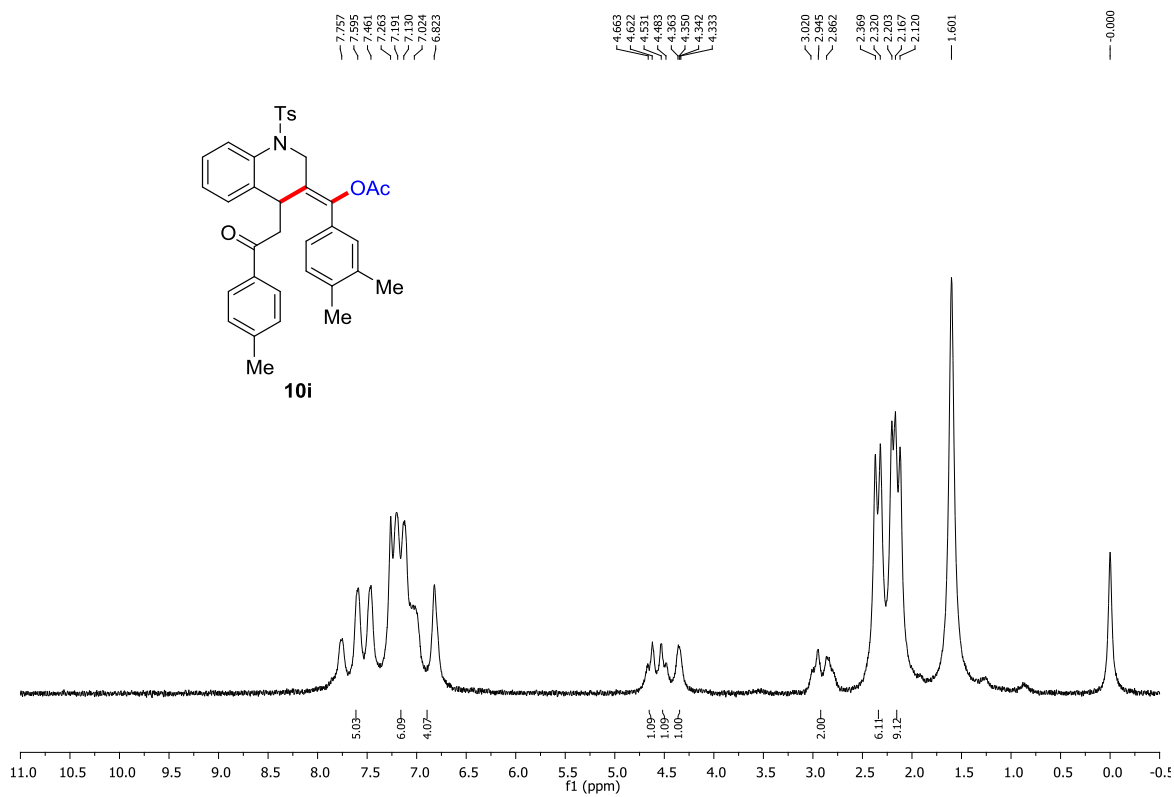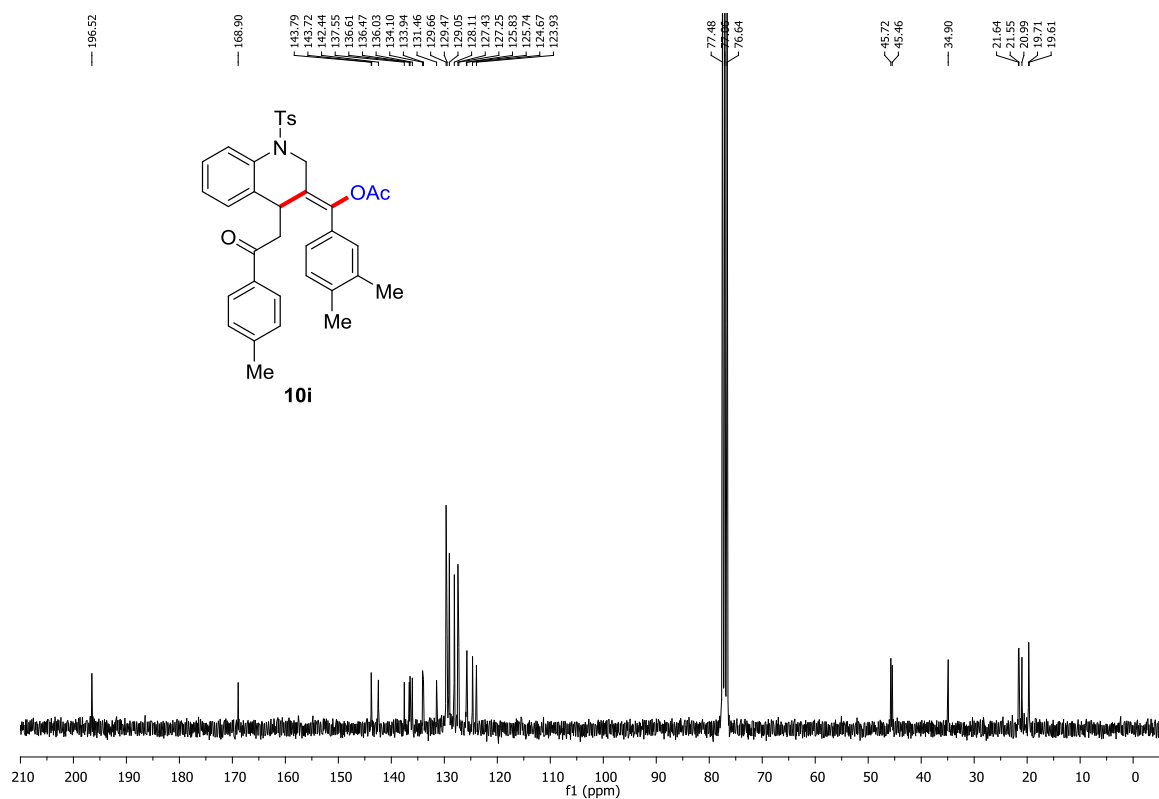

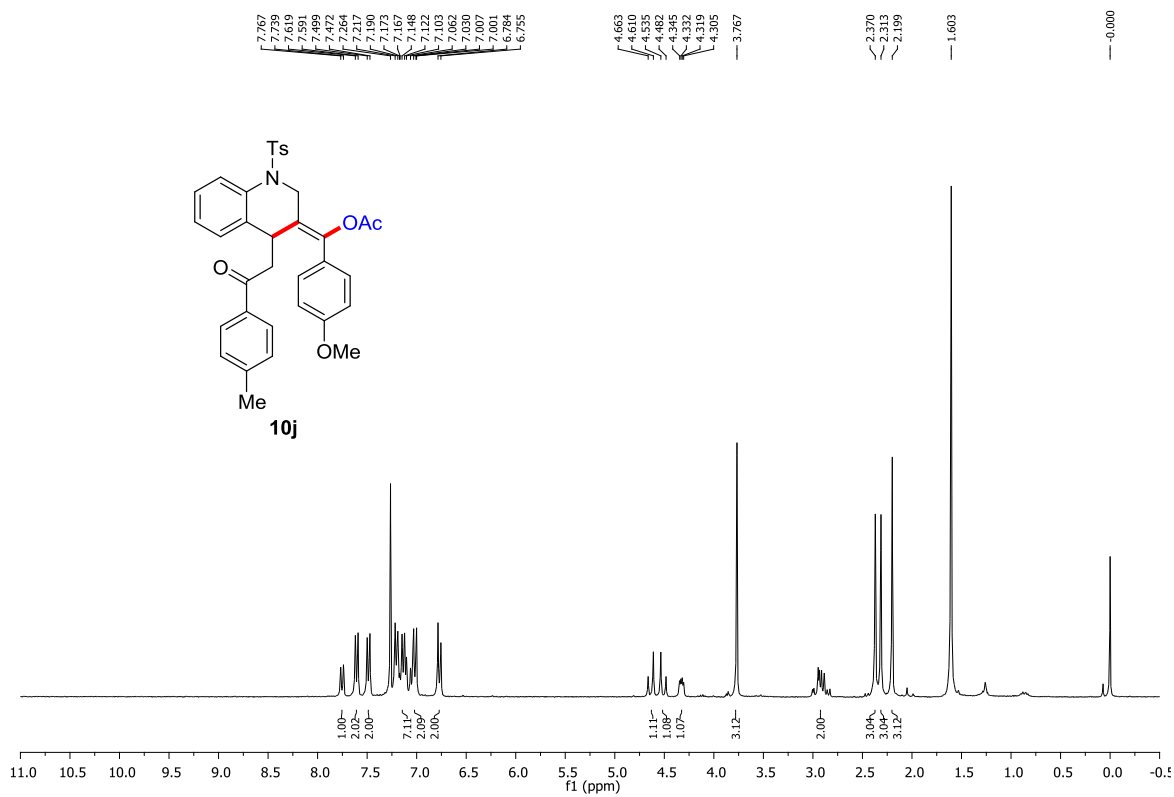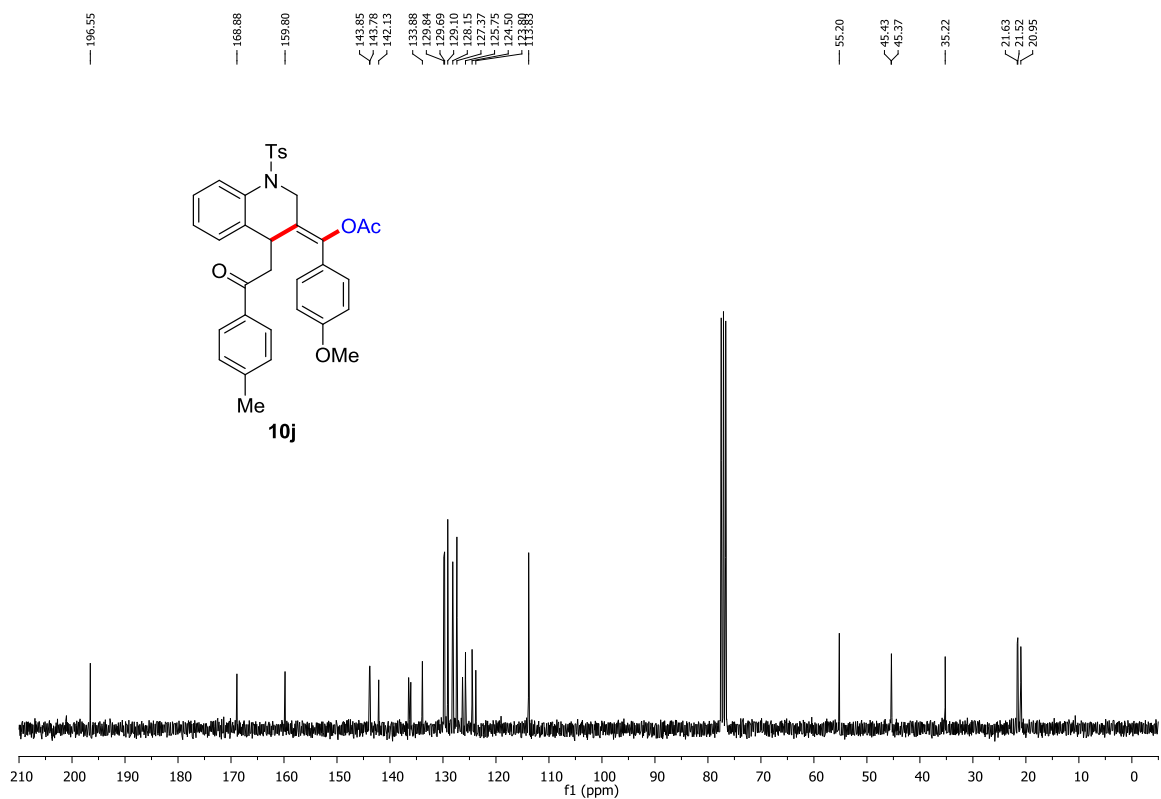

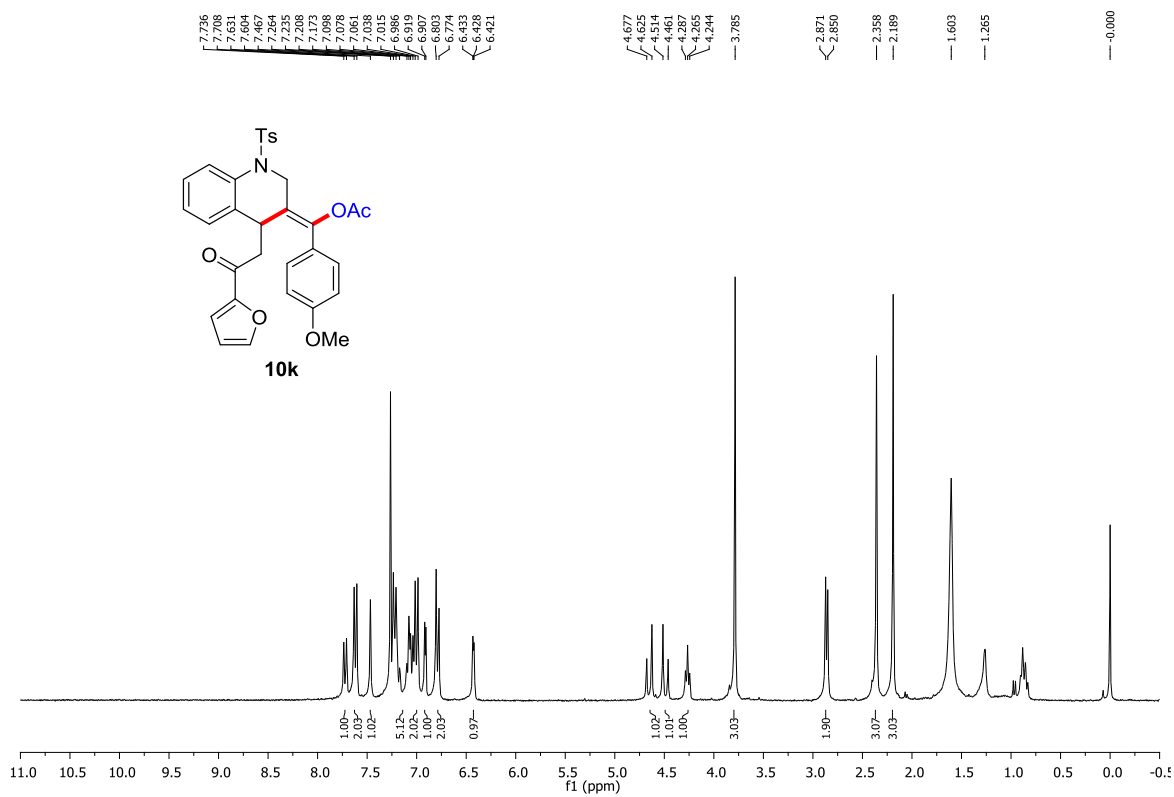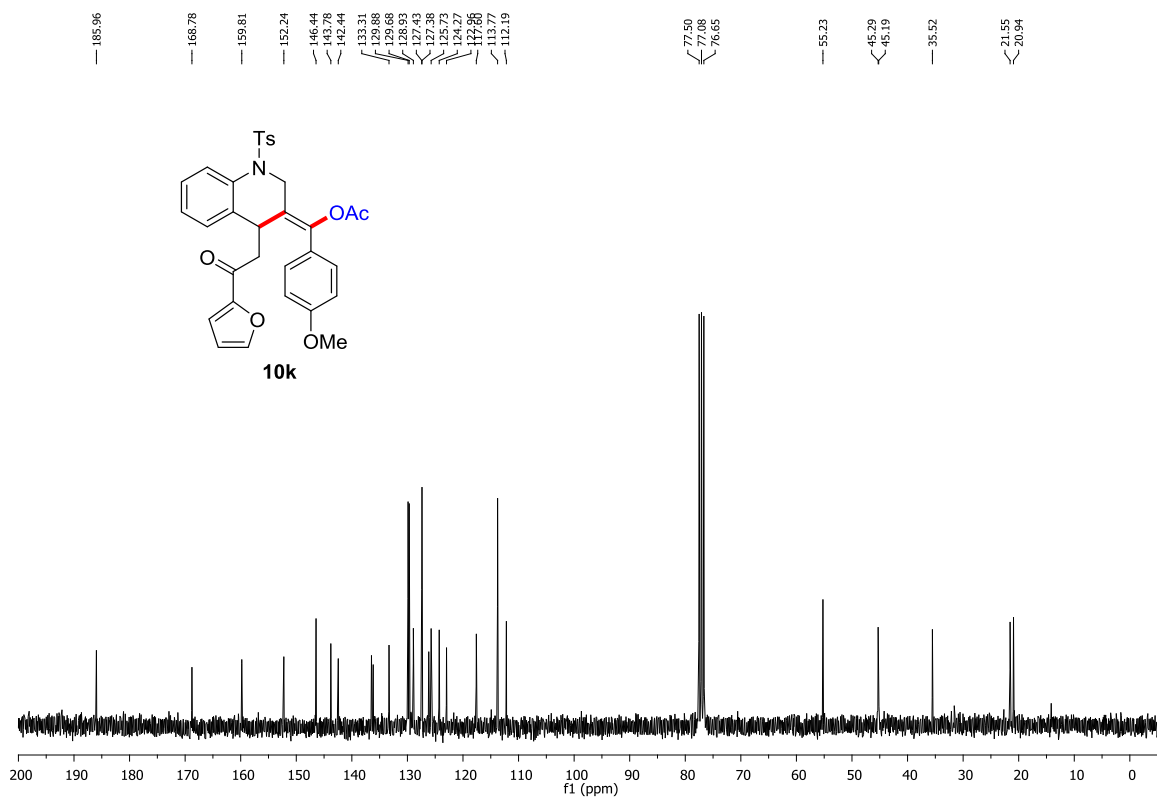

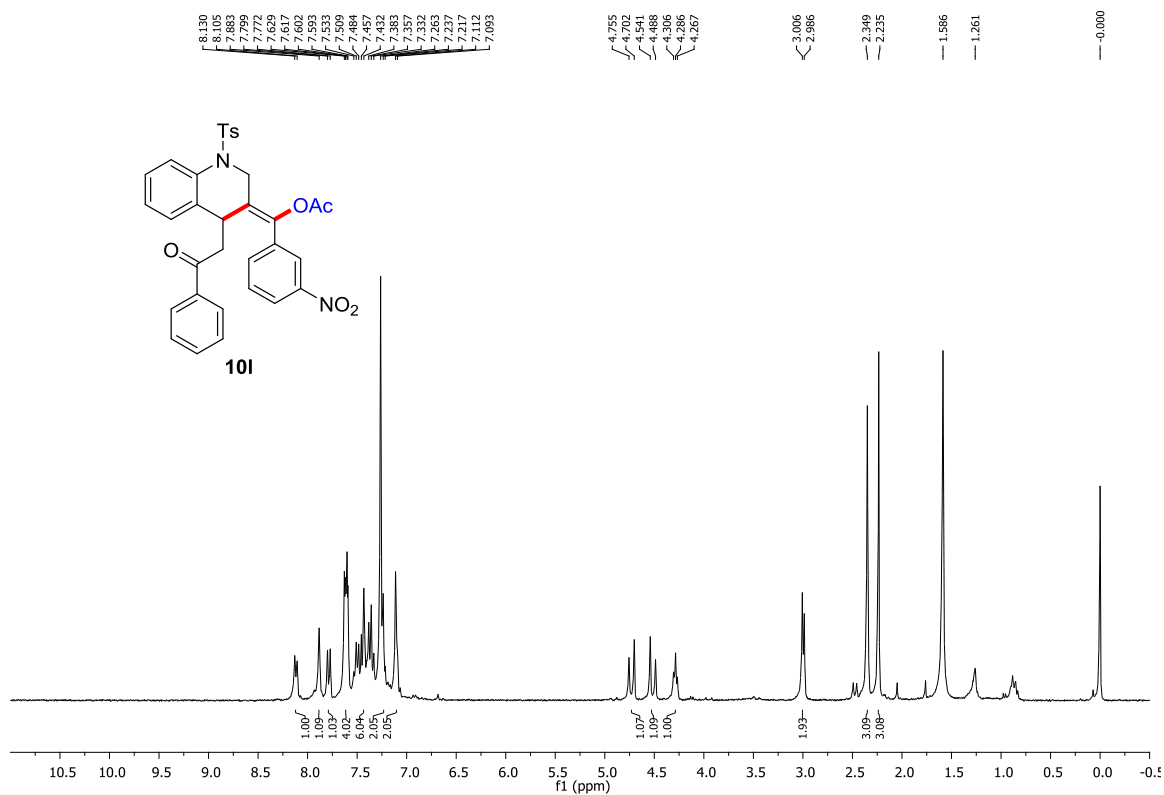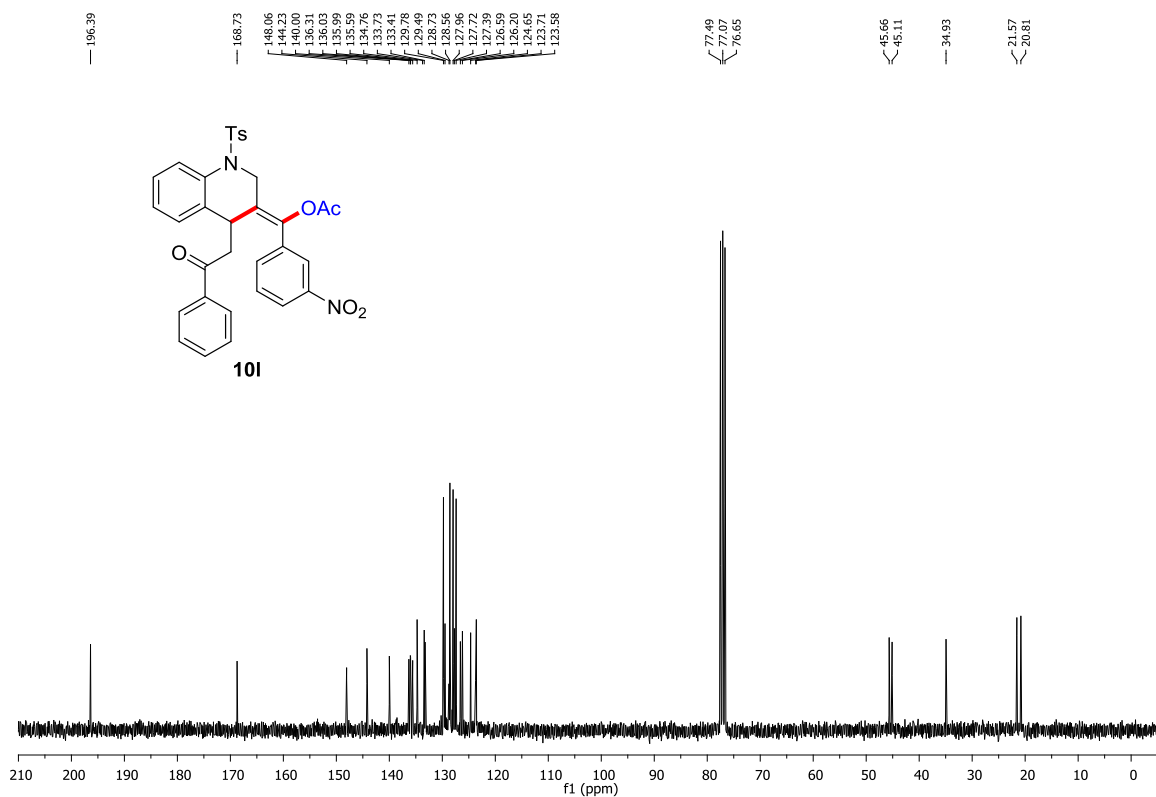

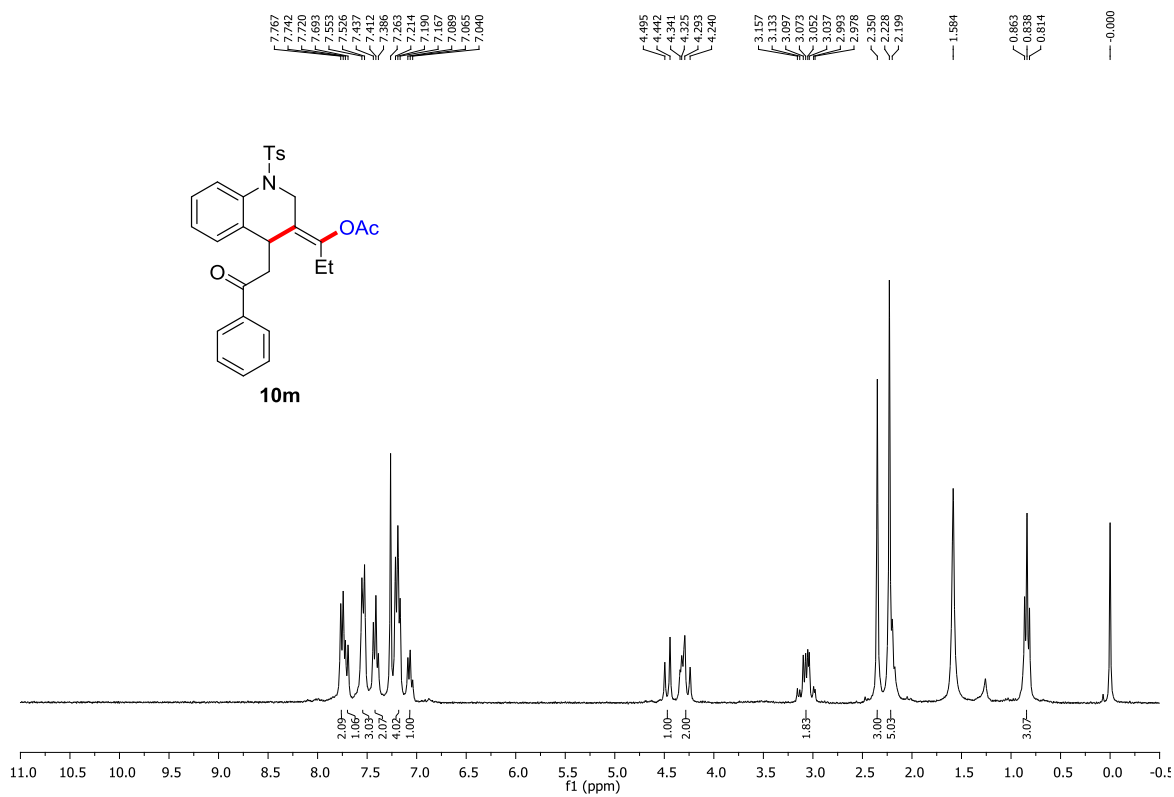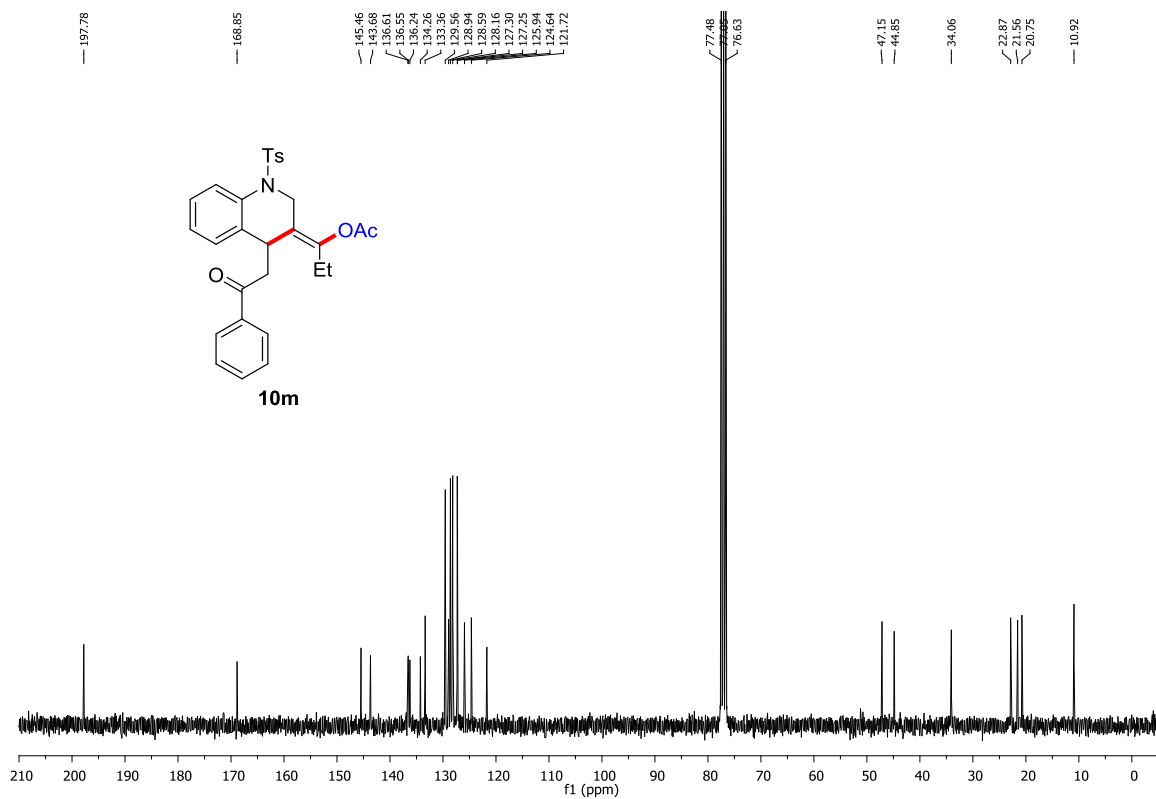



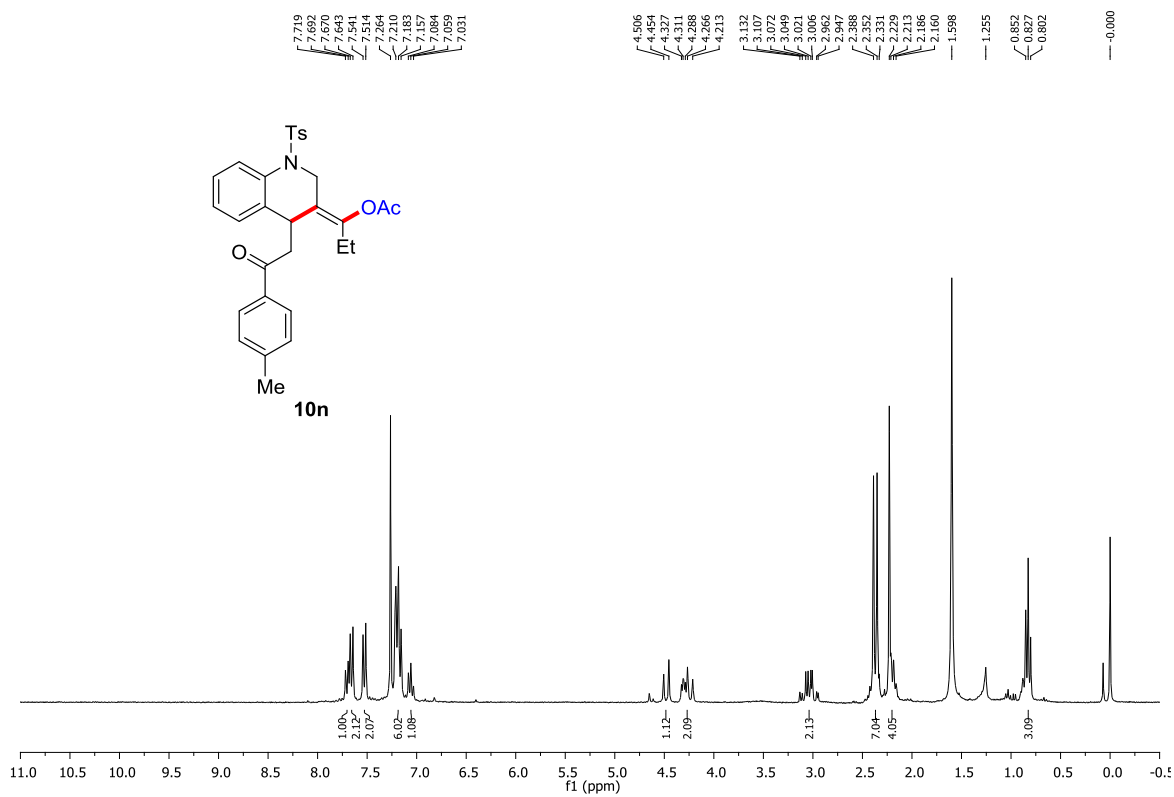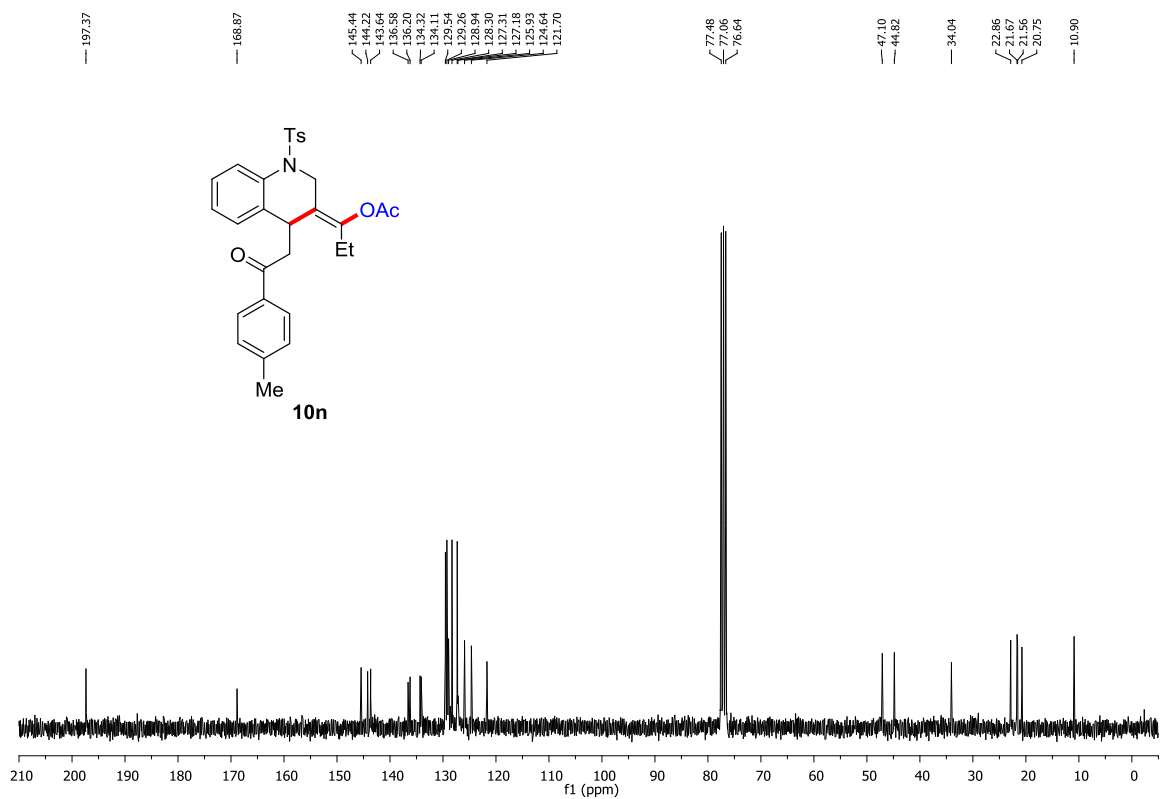

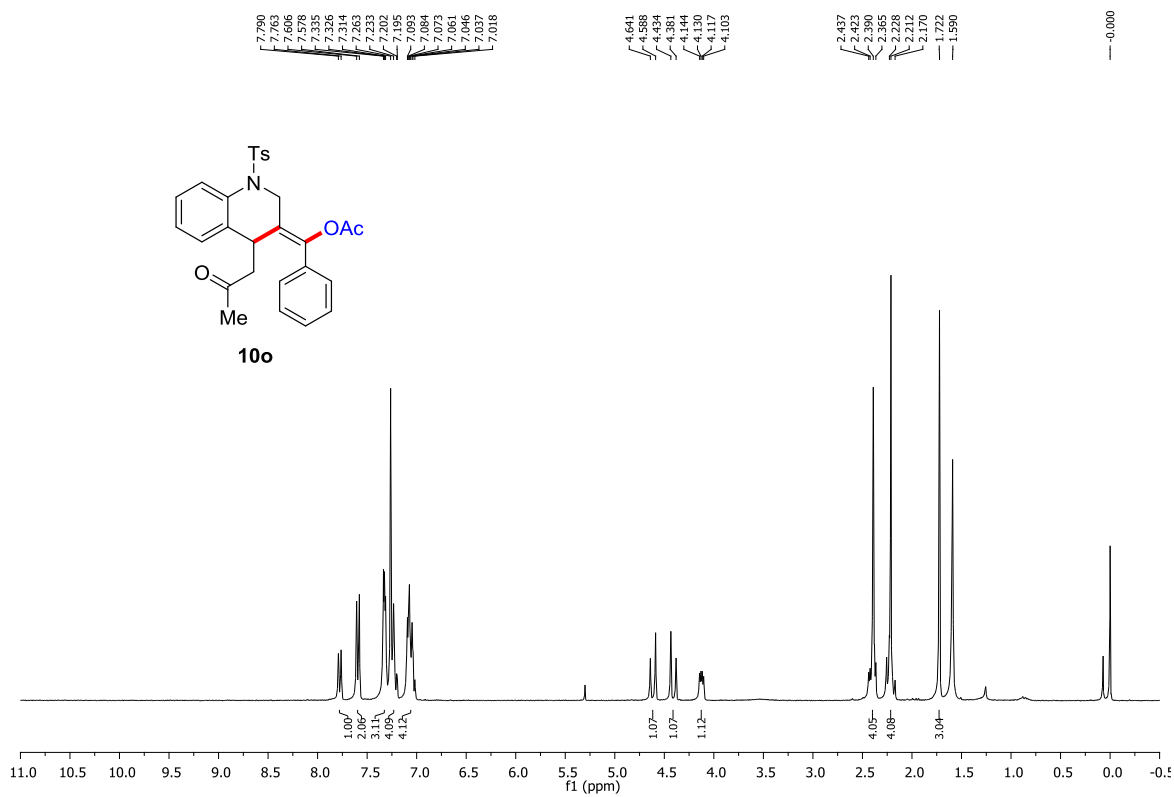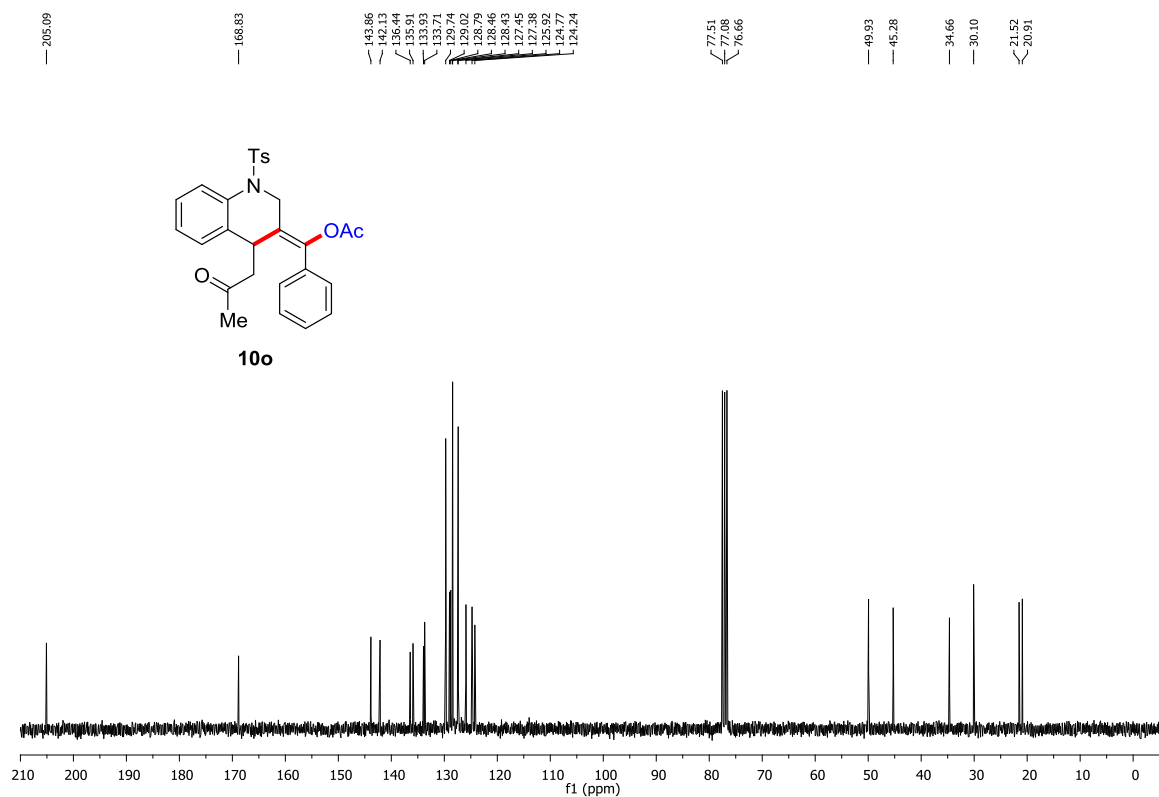

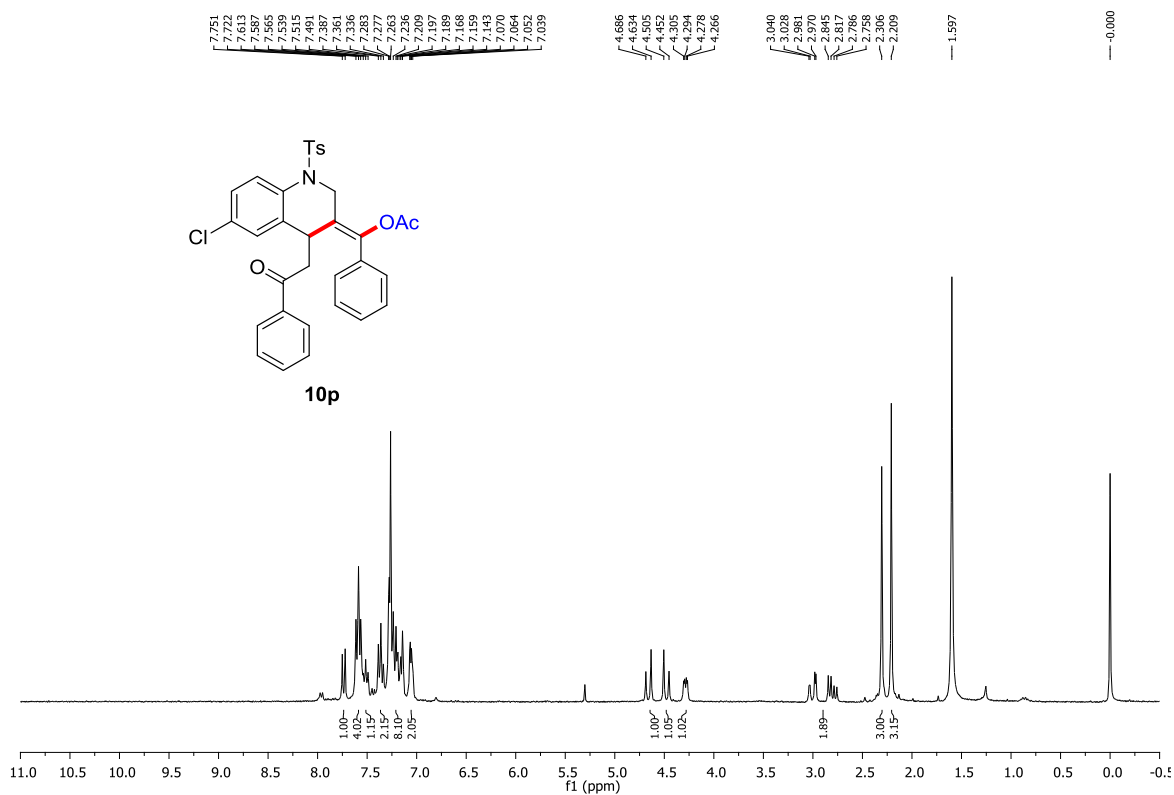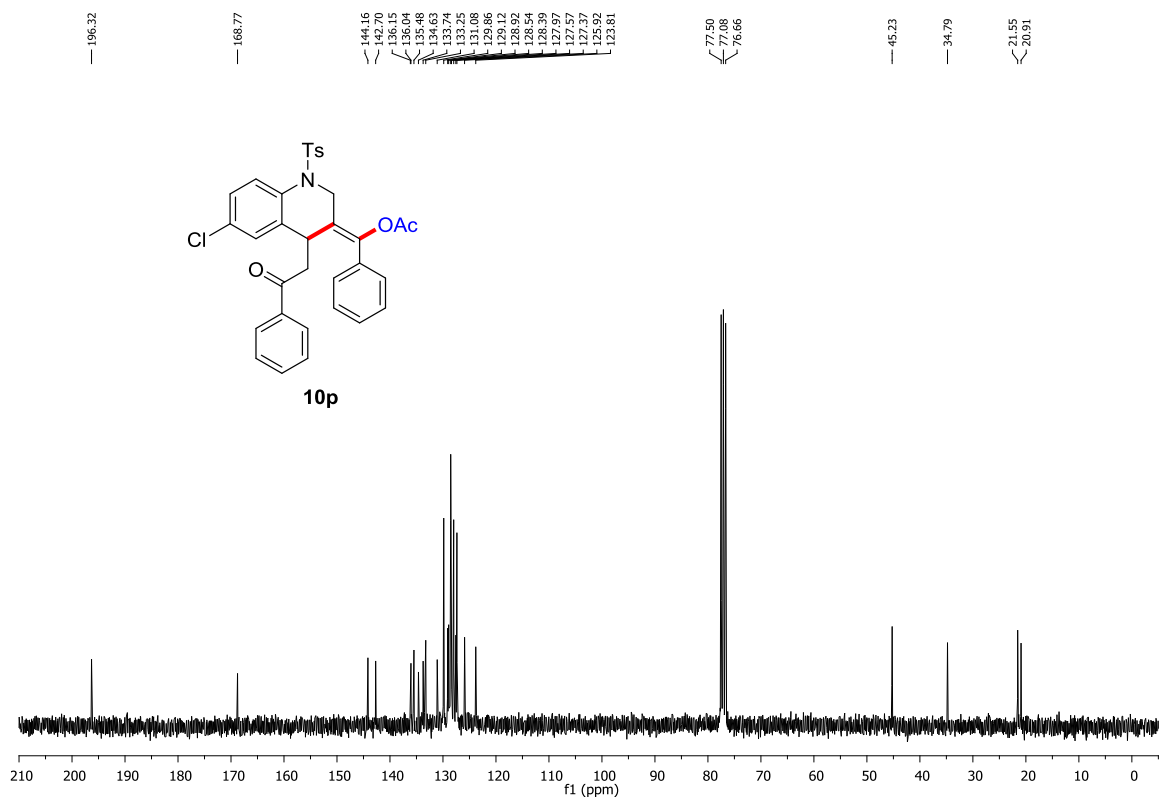

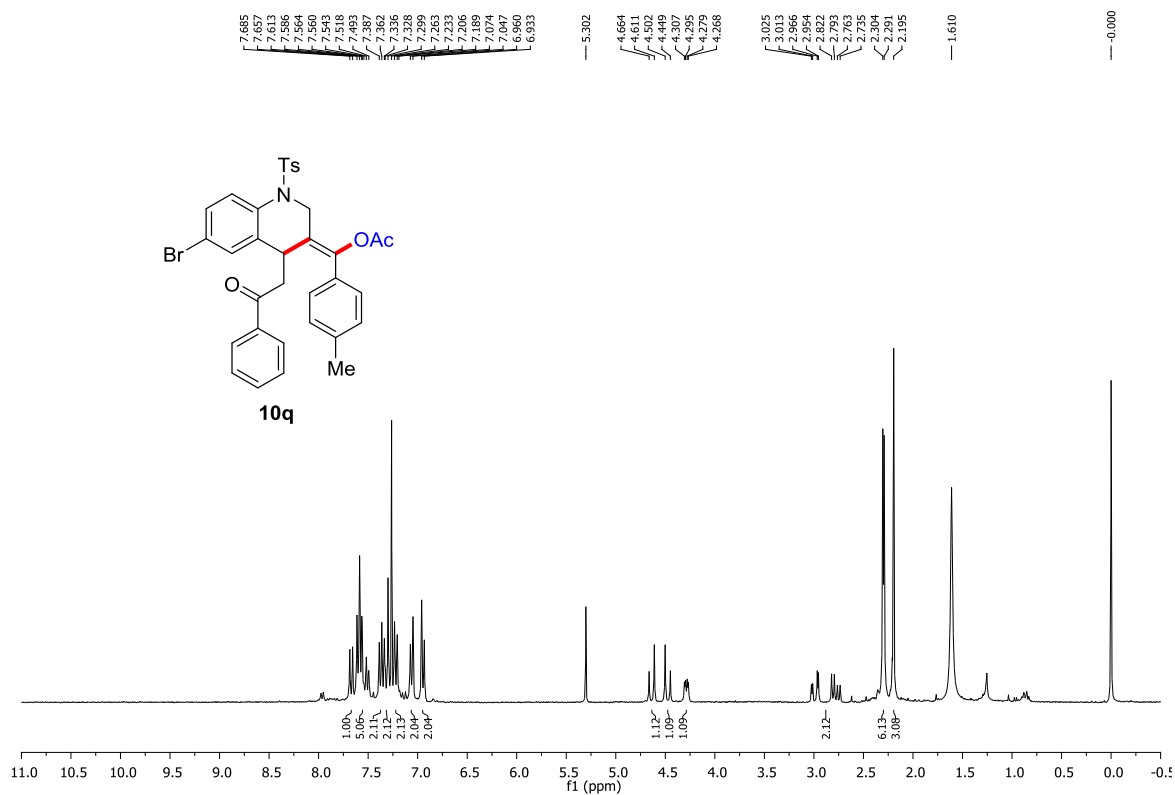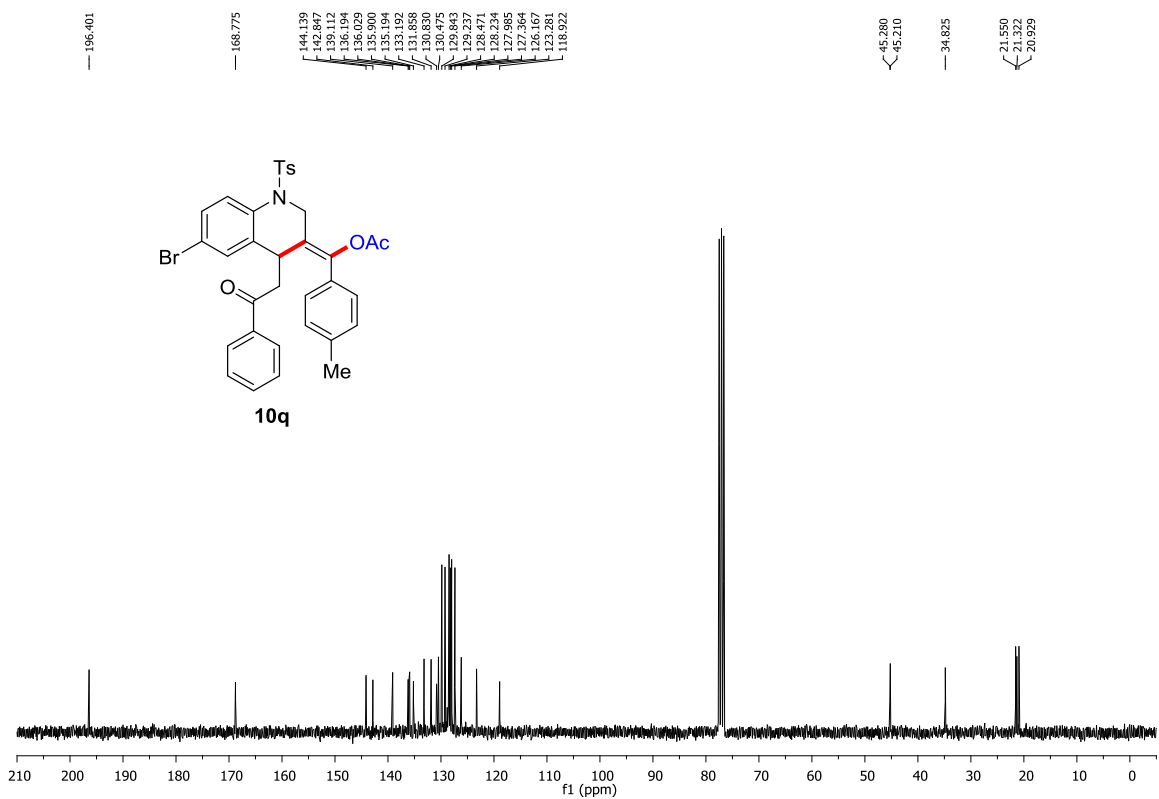

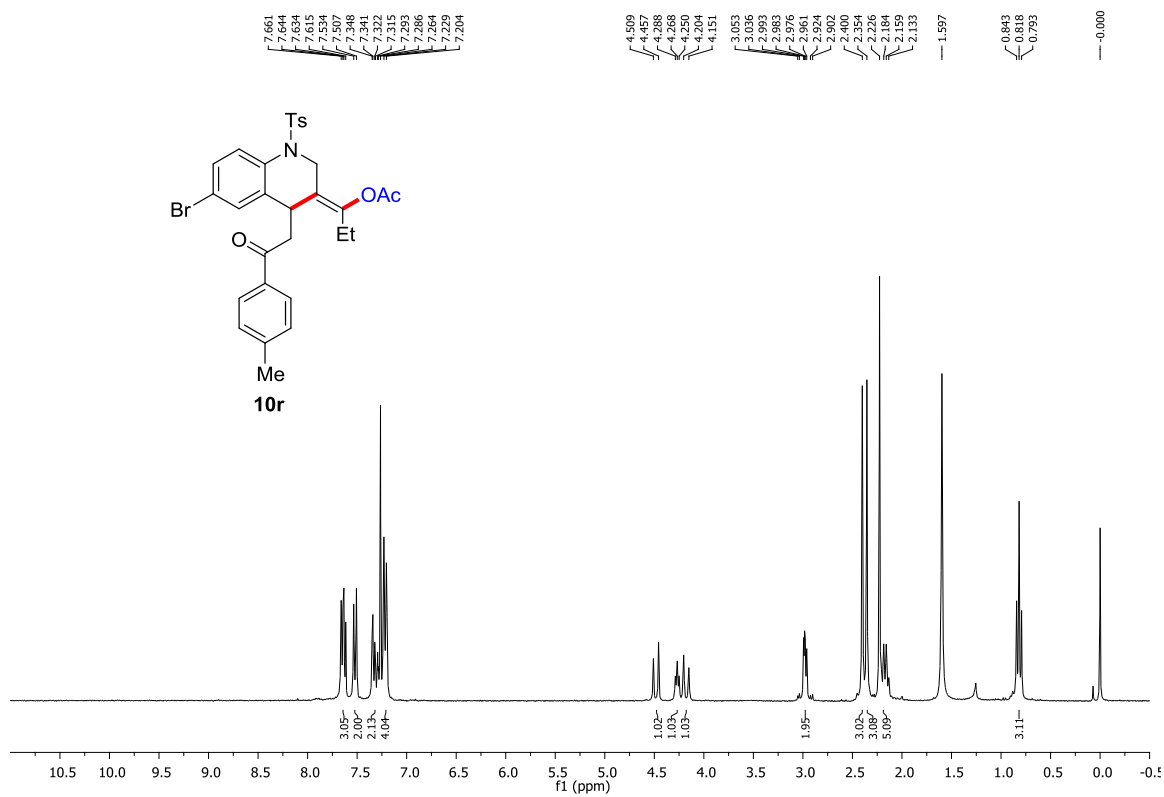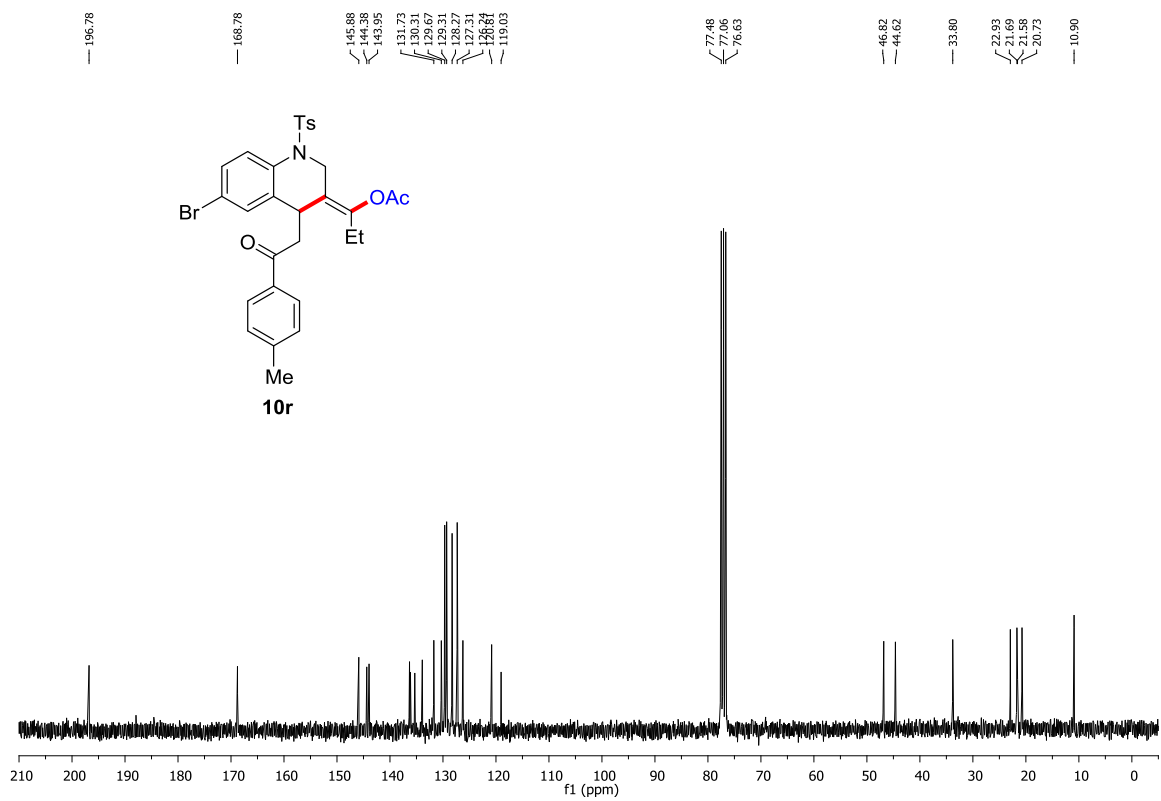

Supplement: d0ob01840f1.pdf [file d0ob01840f1.pdf]
